# 1           **Regrowth-delay Body as a Bacterial Subcellular Structure** 2                           **marking multidrug tolerant Persisters**

3  
4                           Jiayu Yu<sup>1,3</sup>, Yang Liu<sup>1,3</sup>, Huijia Yin<sup>1</sup> and Zengyi Chang<sup>1,2\*</sup>

5  
6           <sup>1</sup>The State Key Laboratory of Protein and Plant Gene Research, School of Life  
7           Sciences, Peking University, Beijing 100871, P.R. China

8           <sup>2</sup>Center for Protein Science, Peking University, Beijing 100871, P.R. China

9           <sup>3</sup>J.Y. and Y.L. contributed equally to this work

10          \*Correspondence: [changzy@pku.edu.cn](mailto:changzy@pku.edu.cn)

## 11          **Summary**

12          **Bacteria have long been recognized to be capable of entering a phenotypically non-**  
13          **growing persister state, in which the cells exhibit an extended regrowth lag and a**  
14          **multidrug tolerance, thus posing a great challenge in treating infectious diseases.**  
15          **Owing to their non-inheritability, low abundance of existence, lack of metabolic**  
16          **activities, and high heterogeneity, properties of persisters remain poorly**  
17          **understood. Here, we report our accidental discovery of a hitherto unreported**  
18          **subcellular structure that we term the regrowth-delay body, which is formed only**  
19          **in non-growing bacterial cells and sequesters multiple key proteins. As of now,**  
20          **this structure, that dissolves when the cell resumes growth, is the most**  
21          **distinguishable subcellular structure marking persisters. Our studies also indicate**

22 **that persisters exhibit different depth of persistence, as determined by the status**  
23 **of their regrowth-delay bodies. Our findings imply that suppressing the formation**  
24 **and/or promoting the dissolution of regrowth-delay bodies could be viable**  
25 **strategies for eradicating persisters.**

26

## 27 **INTRODUCTION**

28 It has been well documented that, in a genetically homogeneous population of  
29 bacterial cells, a subset are able to enter a phenotypically dormant, non-growing (or,  
30 more precisely, of low metabolic activity) state. This state has been variably named as  
31 sporulation, latency, regrowth lag, persisters, or the viable but nonculturable, in  
32 laboratory, clinical, or environmental microbiology (Burke et al., 1925; Chesney, 1916;  
33 Kaprelyants et al., 1993; Lewis, 2007, 2010; Monod, 1949; Roszak and Colwell, 1987).  
34 Although this state of bacterial cells has been recognized for more than 100 years, much  
35 remain unknown on its properties, such as how the bacterial cells enter, maintain and  
36 exit such a unique state, that is best known for its non-inheritable multidrug tolerance  
37 (Balaban et al., 2013; Kaldalu et al., 2016; Kell et al., 2015; Lewis, 2007; Pinto et al.,  
38 2015).

39 The regrowth lag phenomenon, initially recognized by Max Muller in 1895  
40 (Chesney, 1916), was observed as soon as bacterial culturing became feasible (Coplans,  
41 1910), but remains the most poorly understood stage of the bacterial growth cycle  
42 (Monod, 1949; Rolfe et al., 2012). In a related phenomenon, bacterial dormancy was

43 defined as a state of certain bacterial cells that exhibits a long-lasting regrowth lag  
44 (Burke et al., 1925; Chesney, 1916). Later, the term persister was coined to denote an  
45 extremely small subpopulation of dormant, non-dividing bacterial cells that are not  
46 killed by concentrations of antibiotics sufficiently high to kill the actively dividing ones  
47 (Bigger, 1944). The persisters were presumed to be responsible for the post-treatment  
48 relapse of bacterial infections (Bigger, 1944; Fisher et al., 2017; Lewis, 2007, 2010;  
49 Mcdermott, 1958). It was emphasized that the persisters are not resistant to antibiotics,  
50 since they produce offspring that are as susceptible to antibiotics as their parent cells  
51 (Bigger, 1944). More recently, it was unveiled that the bacterial cells in the natural  
52 environment are commonly in a viable but nonculturable dormant state (Ayrapetyan et  
53 al., 2015; Xu et al., 1982), one that is highly similar to the persisters.

54• Although much effort has been made to understand the molecular mechanisms  
55 leading to the formation of persisters, and certain specific protein factors (like the Hip)  
56 or small molecules (like the pppGpp) have been claimed to be important for this process  
57 (Black et al., 1991, 1994; Moyed and Bertrand, 1983), not much is certain up to now  
58 (Balaban et al, 2013; Kaldalu et al, 2015; Korch et al., 2003; Chowdhury et al., 2016).  
59 The slow pace of learning about this state of bacterial cells is apparently attributed to  
60 the great technical difficulty of unequivocally identifying them, which are presumed to  
61 exist in extremely small numbers in a genetically uniform population, often with no  
62 significant morphological distinctions (Balaban et al., 2013; Kaldalu et al., 2016; Kell  
63 et al., 2015). Because of this, persisters have been hitherto commonly perceived only

64 on the basis of their lack of growth and multidrug tolerance. In particular, persisters  
65 have been conventionally detected by indirectly measuring the number of colony-  
66 forming units (CFUs) after treating the cell samples with a high concentration of a  
67 certain antibiotic (Jiafeng et al., 2015; Orman and Brynildsen, 2015), or as cells that do  
68 not grow in the presence, but regrow after the removal, of antibiotics when monitored  
69 with a microfluidic device (Balaban et al., 2004).

70• We have been trying to explore proteins when they are present in living bacterial  
71 cells, as by performing protein photo-crosslinking analysis mediated by genetically  
72 introduced unnatural amino acids (Fu et al., 2013; Zhang et al., 2011). In one recent  
73 study, we examined the assembly patterns of the FtsZ protein, which plays an essential  
74 role by assembling into the Z-ring structure for each bacterial cell to divide into two via  
75 the cytokinesis process (Dai and Lutkenhaus, 1991; Erickson et al., 2010; Haeusser and  
76 Margolin, 2016), as well as for each mitochondrion (Beech et al., 2000) or chloroplast  
77 (TerBush et al., 2013) to divide into two. In particular, we revealed hitherto unreported  
78 lateral interactions between the FtsZ protofilaments that are essential for FtsZ to  
79 assemble into the dynamic Z-ring structure in living bacterial cells (Guan et al., 2018).

80 As an exciting byproduct of that study, we accidentally revealed the presence of a  
81 novel reversible subcellular structure that we named it as the regrowth-delay body. This  
82 structure is formed in non-growing late stationary-phase bacterial cells and sequesters  
83 multiple proteins essential for cell growth. Remarkably, the regrowth-delay bodies  
84 become dissolved when a bacterial cell exits the regrowth lag and resumes growth,

85 meanwhile releasing the sequestered proteins for re-functioning. We also demonstrated  
86 that a higher degree of regrowth-delay body formation is correlated to a longer duration  
87 of regrowth lag as well as a higher level of antibiotic tolerance, not only in *E. coli* but  
88 also in two bacterial pathogens. Therefore, the regrowth-delay body not only acts as a  
89 unique and highly valuable biomarker for distinguishing the non-growing dormant  
90 persister cells from the actively growing non-persister cells, but also acts as a dynamic  
91 biological timer for bacterial cells to exit the regrowth lag. Our studies also indicate  
92 that each persister exhibits a particular depth of persistence, which seems to explain the  
93 long-observed heterogeneous nature of the persister subpopulation. Our findings should  
94 be proven greatly valuable not only for specifically identify and explore the persisters  
95 in any cell population, but also for designing viable strategies to eradicate the  
96 formidable multidrug-tolerant pathogenic persisters.

97

## 98 **RESULTS**

99

### 100 **The cell division protein FtsZ no longer self-assembles but exists as an insoluble** 101 **form in non-growing bacterial cells**

102 In an attempt to unveil how FtsZ assembles into the dynamic Z-ring structure  
103 during the cytokinesis of bacterial cell division, we performed systematic protein photo-  
104 crosslinking analyses with FtsZ variants containing the genetically introduced  
105 photoactive unnatural amino acid pBpa (*p*-benzoyl-L-phenylalanine) (Chin et al., 2002)

106 in living bacterial cells. This allowed us to uncover novel lateral interactions between  
107 the FtsZ protofilaments that were demonstrated to be essential for cell division (Guan  
108 et al., 2018).

109 During these studies, out of curiosity, we additionally examined the status of FtsZ  
110 in non-dividing/non-growing bacterial cells, as has never been addressed by people  
111 working with FtsZ. We revealed, as expected, that a FtsZ variant, though self-  
112 assembled into homo-oligomers in actively dividing cells (**Fig. S1A**, lanes 2 and 6), no  
113 longer does so (**Fig. S1A**, lanes 4 and 8) in the non-dividing/non-growing cells.  
114 Astonishingly, we observed that most of the free FtsZ monomers, together with almost  
115 all the photo-crosslinked products, were detected in the insoluble pellet fraction of  
116 lysates of the non-growing cells (**Fig. S1B**, lane 8). By contrast, all the photo-  
117 crosslinked FtsZ dimers and the free FtsZ monomers were principally detected in the  
118 soluble supernatant fractions of lysates of actively dividing cells (**Fig. S1B**, lane 3).

119 In light of this puzzling observation, we then examined the distribution pattern of  
120 the endogenous FtsZ (instead of the FtsZ variant we examined above) in *E. coli* cells.  
121 Likewise, we revealed that the endogenous FtsZ protein was largely detected in the  
122 soluble supernatant fraction of actively dividing cells (**Fig. 1A**, lane 2), but in the  
123 insoluble pellet fraction of the non-dividing/non-growing cells (lane 6). As comparison,  
124 we demonstrated that EF-Tu (one of the most abundant proteins in bacterial cells) and  
125 GroEL (a molecular chaperone binding to misfolded client proteins) were both largely  
126 detected in the supernatant fraction (**Fig. 1A**, lanes 2 and 5), with hardly any in the

127 pellet fraction (lanes 3 and 6) of either actively dividing or non-dividing cells. Taken  
128 together, these results revealed for the first time that the FtsZ protein (as well as proteins  
129 interacting with it) exists as an insoluble form in non-dividing/non-growing bacterial  
130 cells.

131

132 **The FtsZ protein exists in two cell-pole granules in each non-growing bacterial**  
133 **cell**

134 We subsequently tried to monitor the status of FtsZ by performing live-cell  
135 imaging analysis. For this purpose, we started by heterologously expressing FtsZ-  
136 mNeonGreen, a form of FtsZ being fused to the green fluorescent protein mNeonGreen,  
137 in bacterial cells. Here, the fusion protein was expressed at a relatively low level, which  
138 was achieved via the leaky transcription of the Tet promoter (i.e., with no addition of  
139 the inducing agent), such that the fluorescent FtsZ fusion protein would be incorporated  
140 into, but not interrupt, the Z-ring structure that was largely formed via the assembly of  
141 endogenous wild type FtsZ. We first verified an effective incorporation of FtsZ-  
142 mNeonGreen into the Z-ring structure in actively dividing log-phase cells (**Fig. 1B**, top),  
143 like what was reported before (Ma et al., 1996). Remarkably, we then detected FtsZ-  
144 mNeonGreen as two cell pole-granules in each non-dividing cell (**Fig. 1B**, bottom). As  
145 a control, the unfused fluorescent mNeonGreen protein was shown to be evenly  
146 distributed in the cytoplasm of either actively-dividing or non-dividing bacterial cells  
147 (**Fig. S2**).

148 For further systematic live-cell imaging analysis, we subsequently constructed a  
149 bacterial strain whose genome was modified to express FtsZ-mNeonGreen (rather than  
150 from a plasmid), in parallel with the normally expressed endogenous FtsZ. In particular,  
151 we integrated the *ftsZ-mNeonGreen* gene into the genomic rhamnase operon (as  
152 illustrated in **Fig. S3A**) and demonstrated that the FtsZ-mNeonGreen protein would be  
153 produced only in the presence of rhamnase (the inducing sugar) in this *ftsZ-*  
154 *mNeonGreen* strain (**Fig. S3B**), hardly affecting the growth of the cells (**Fig. S3C**). We  
155 also verified the presence of FtsZ-mNeonGreen in the Z-ring structure in actively  
156 dividing log-phase but in the cell-pole granules in non-dividing late stationary-phase  
157 *ftsZ-mNeonGreen* cells (**Fig. S3D**).

158 Our live-cell imaging analysis employing this *ftsZ-mNeonGreen* strain revealed  
159 that the cell-pole granules seem to be closely associated with the inner membrane but  
160 not surrounded by it (**Fig. S4A**, middle panel), as verified by results (**Fig. S4B**) of  
161 staining with the membrane-specific dye FM4-64 (Fishov and Woldringh, 1999). These  
162 imaging results meanwhile demonstrated that the cell-pole granules occupy cytosolic  
163 locations that are hardly accessible to other cytosolic proteins (**Fig. S4A**, bottom panel),  
164 suggesting a compact nature. In line with this, we observed that these granules were  
165 maintained intact even after the cells were broken (**Fig. S4C**).

166

167 **The FtsZ protein in cell-pole granules are apparently folded**



168       Aggregates of misfolded proteins have been reported to exist at the poles in *E. coli*  
169 cells, but only under heat shock conditions (Lindner et al., 2008; Winkler et al., 2010).  
170 Additionally, insoluble proteins, which were naturally assumed to be misfolded, have  
171 been reported to accumulate in stationary-phase *E. coli* cells (Kwiatkowska et al., 2008;  
172 Leszczynska et al., 2013; Maisonneuve et al., 2008). In view of these reports, we then  
173 attempted to clarify the folding status of FtsZ in the cell-pole granules, despite the fact  
174 that FtsZ was demonstrated to exist in a soluble form when heterologously over-  
175 expressed in bacterial cells (Mukherjee and Lutkenhaus, 1998).

176       Considering that the molecular chaperones DnaK and ClpB, as well as the protease  
177 ClpP were reported to be associated with protein aggregates formed under stress  
178 conditions (Winkler et al., 2010), we decided to analyze whether or not they are  
179 associated with the cell-pole granules. Our blotting analysis demonstrated that all these  
180 three quality control proteins were primarily detected in the supernatant (**Fig. S5A**, lane  
181 2) with hardly any detected in the pellet (lane 3) of non-growing late stationary-phase  
182 cell lysates. In line with this, our live-cell imaging data showed that neither DnaK nor  
183 ClpB, each being expressed as a form fused to the red fluorescent protein mCherry (by  
184 manipulating their endogenous genes on the genomic DNA of the *ftsZ-mNeonGreen*  
185 strain), was detected in the cell-pole granules (**Fig. 1C**, bottom panels). The imaging  
186 data meanwhile revealed, interestingly, that both DnaK and ClpB, though being evenly  
187 dispersed in the cytosol of actively dividing log-phase cells, were concentrated near the  
188 two cell poles, at sites very close to but clearly separate from the FtsZ-containing cell-

189 pole granules, but only in a small number of the non-growing late stationary-phase cells  
190 (**Fig. 1C**, bottom panels). These subcellular sites, which might represent ones where  
191 DnaK and ClpB (themselves being in soluble forms, as shown in **Fig. S5A**) were co-  
192 localized with certain form of protein aggregates, are worth further investigation in the  
193 future. Taken together, these results did not provide evidence to support the possibility  
194 that the cell-pole granules are typical aggregates formed by misfolded proteins.

195 As an attempt to further assess the folding status of FtsZ in the cell-pole granules,  
196 we examined whether inhibitor proteins that only bind to folded FtsZ could prevent  
197 FtsZ from entering the granules. For this purpose, we analyzed the CbtA and KilR  
198 proteins, each of which was known to bind to and to block monomeric FtsZ for  
199 assembling into the Z-ring structure in cells (Conter et al., 1996; Heller et al., 2017).  
200 Either CbtA or KilR was then expressed from a plasmid, under the control of an  
201 anhydrotetracycline-inducible promoter. We first verified their capacity to inhibit FtsZ  
202 from assembling into the Z-ring structure in actively dividing log-phase *ftsZ*-  
203 *mNeonGreen* cells (**Fig. S5B**).

204 We then showed that FtsZ was no longer able to enter the cell-pole granules when  
205 the CbtA expression was induced at the stationary phase (**Fig. 1D**, left panel). A similar  
206 effect was not observed when KilR was induced (**Fig. S5C**). In agreement with these  
207 findings, our immunoblotting analysis confirmed that FtsZ became undetectable in the  
208 pellet fraction but remained in the supernatant when CbtA was expressed (**Fig. 1D**,  
209 right panel).

210 Furthermore, the conclusion that FtsZ in the cell-pole granules is folded was also  
211 supported by our *in vivo* protein photo-crosslinking analysis. Specifically, the data (**Fig.**  
212 **S5D**) reveal that when the unnatural amino acid residue pBpa was placed at residue  
213 positions close to each other in space (e.g., positions 151, 166 and 174, or 31, 47, 51  
214 and 54) according to the reported crystal structure (Löwe and Amos, 1998), similar  
215 patterns of photo-crosslinked products were generated. By contrast, when pBpa was  
216 placed at sites that were spatially distant (e.g., positions 61, 85, 299, and 340), different  
217 patterns of photo-crosslinked products were detected.

218 Collectively, these results strongly support the conclusion that FtsZ in the granules  
219 is folded, rather than misfolded.

220

221 **The cell-pole granules become dissolved in cells exiting their regrowth lag and**  
222 **resuming growth**

223 We next sought to decipher the fate of the cell-pole granules when the bacterial  
224 cells resume their growth. For this purpose, we re-cultured the non-growing late  
225 stationary-phase *ftsZ-mNeonGreen* cells in fresh culture medium lacking the inducer  
226 rhamnose to avoid the production of new FtsZ-mNeonGreen protein. Remarkably, we  
227 observed an effective relocation of FtsZ-mNeonGreen from the cell-pole granules to  
228 the Z-ring structure that was formed in cells ending their regrowth lag and resuming  
229 the growth (**Fig. 2A**, exemplified by the cells circled with dashed pink or white lines).  
230 These newly assembled Z-ring structures seemed to be fully functional since they

231 enabled the mother cells to split into two daughter cells (e.g., the cell circled with  
232 dashed pink lines at 80 min divided into two daughter cells at 120 min in **Fig. 2A**). Of  
233 equal importance, cells that remained in the regrowth lag state all retained their cell-  
234 pole granules (**Fig. 2A**, exemplified by the cells circled with red dashed lines).

235       Worth of high attention, when the non-growing late stationary-phase *ftsZ*-  
236 *mNeonGreen* cells were recultured in fresh liquid medium lacking rhamnose to the log  
237 phase (with an OD<sub>600</sub> of ~0.5), we observed the maintenance of the cell-pole granules  
238 in an extremely small number of cells (as represented by the cell circled with red dashed  
239 lines in **Fig. 2B**), with all other cells being actively dividing. In our opinion, there is  
240 little doubt that such an inert cell, which is resistant to antibiotic killing (as to be shown  
241 in **Fig. 3F**), should represent the long-sought and elusive persisters (Bigger, 1944).

242       To assess whether such dissolution of the cell-pole granules could occur in the  
243 absence of any new synthesis of proteins in the cells, we repeated the above analysis  
244 by adding chloramphenicol, a ribosome-binding antibiotic that is known to inhibit  
245 protein synthesis in bacterial cells, to the fresh culture medium. Interestingly, we still  
246 observed an effective dissolution of the cell-pole granules in cells exiting the regrowth-  
247 lag and resuming growth (**Fig. 2C**, cells circled with white dashed lines), and we even  
248 occasionally observed the re-formation of Z-ring structures in certain cells (as indicated  
249 by the arrow). Of note, here the Z-ring structure would have to be formed mainly by  
250 using the FtsZ stored in and released from the cell-pole granules, but fluorescently  
251 labeled by a small amount of the incorporated FtsZ-*mNeonGreen* (Ma et al., 1996), also

252 released from the granules. We again observed the cell-pole granules to be effectively  
253 retained in cells that remained in the regrowth-lag (**Fig. 2C**, exemplified by the cell  
254 circled with red dashed lines). In agreement with these live-cell imaging data, our  
255 immunoblotting analysis verified a time-dependent decrease of FtsZ in the insoluble  
256 pellet (**Fig. S6**, lanes 3, 6, and 9), with a corresponding increase of FtsZ in the soluble  
257 supernatant (lanes 2, 5 and 8) when the non-growing wild-type late stationary-phase  
258 cells were re-cultured in fresh LB (Lysogeny Broth) medium containing  
259 chloramphenicol.

260 Importantly, the results displayed in **Fig. 2** also revealed that the cell-pole granules  
261 present in different individual cells seem to exhibit a high degree of heterogeneity.  
262 Specifically, the cell-pole granules became totally dissolved, partially dissolved, or  
263 remained almost completely unaltered depending on the particular cell (clearly shown  
264 by the cells viewed at 120 min in **Fig. 2A** as well as those at 90 min in **Fig. 2C**). These  
265 data meanwhile suggest that an effective dissolution of the cell-pole granules is a  
266 prerequisite for a cell to end its regrowth-lag and resume growth, whereas the lack of  
267 their dissolution marks the maintenance of the non-growing persister state for a cell (as  
268 represented by the one shown in **Fig. 2B**).

269

270 **The cell-pole granules are formed in a highly heterogeneous manner in different**  
271 **individual cells and in a progressive manner in each cell**

272 We next attempted to learn more about the nature of the manifested heterogeneity  
273 of the cell-pole granules (as shown in **Fig. 2**), by examining their formation process in  
274 the non-growing bacterial cells. For this purpose, we initially planned to employ a  
275 microfluidic chip device to monitor both the formation, during the non-growing phase,  
276 and the dissolution, during the regrowth phase, of the cell-pole granules in single *ftsZ-*  
277 *mNeonGreen* cells. Unfortunately, our efforts were unsuccessful, mainly because we  
278 were unable to set up a culturing condition under which the cell-pole granules were  
279 formed in the bacterial cells being placed in the available microfluidic system (likely  
280 due to a lack of high cell density or other unknown factors). Given this failed attempt,  
281 we then decided to address this issue by analyzing the cell population.

282 We started by conducting a qualitative live-cell imaging analysis to assess how  
283 cell-pole granules are formed in the non-growing *ftsZ-mNeonGreen* cells along the  
284 culturing process. The data, displayed in **Fig. 3A**, revealed that the formation of cell-  
285 pole granules appears to occur in a progressive manner in each individual cell, as the  
286 sizes of the cell-pole granules appeared to be different in different individual cells.  
287 Meanwhile, the data indicates a high heterogeneity in regards to the formation of cell-  
288 pole granules among the cell population. For instance, at 15 h of culturing, cell-pole  
289 granules are formed in some of the cells, while a small portion of other cells (indicated  
290 by the red arrow) were still dividing (i.e., with Z-ring structures remained visible).

291 Subsequently, we performed a quantitative live-cell imaging analysis to calculate  
292 the percentage of cells in which cell-pole granules were formed at the different

293 culturing time points. As displayed in **Fig. 3B**, the percentage of cells containing the  
294 cell-pole granules clearly increased along the culturing process (data being shown in an  
295 accumulative manner at each time point). Together, these results indicate that the cell-  
296 pole granules are formed in a highly heterogeneous manner among the individual  
297 bacterial cells and in a progressive fashion in each individual cell.

298

299 **Bacterial cells containing more aged cell-pole granules stay in their regrowth-lag**  
300 **state for longer duration.**

301 To uncover the potential differences between the cell-pole granules present at  
302 different stationary-phase culturing time points, we measured the percentage of cells  
303 that retained their cell-pole granules (thus remaining in a regrowth-lag state) after being  
304 recultured in chloramphenicol-containing (and rhamnose-lacking) fresh medium for 30  
305 min. This condition, being similar to that under which the 30 min imaging data shown  
306 in **Fig. 2C** was obtained, represents one under which cells whose cell-pole granules  
307 become fully dissolved (thus exiting the regrowth-lag state) could be effectively  
308 distinguished from the cells whose cell-pole granules remained largely unaltered (thus  
309 remaining in the regrowth-lag state).

310 The data, shown in **Fig. 3C** (red columns) clearly indicate that a higher percentage  
311 of cells remained in the regrowth-lag state when the non-growing cell samples were  
312 taken from a later stationary phase culturing point. A regression analysis revealed the  
313 best fit between the percentages of cells remaining in regrowth-lag state during

314 reculturing and the percentages of cells whose cell-pole granules had existed for more  
315 than 3 hours during the stationary-phase (pink columns in **Figs. 3C**). These data suggest  
316 that for each individual bacterial cell, the more aged its cell-pole granules, the longer  
317 its duration of regrowth lag.

318       This correlation between the duration of the regrowth-lag and the age of the cell-  
319 pole granules was further demonstrated by comparing the average re-division initial  
320 doubling times (re-division  $T_{id}$ ) manifested by the cells that were taken from different  
321 stationary-phase culturing time points and recultured. Here, for each cell sample, the  
322 re-division  $T_{id}$  value was calculated based on its re-culturing growth curve (as displayed  
323 in **Fig. S7**), and reflects its duration of regrowth-lag. The data, presented in **Fig. 3D**,  
324 clearly reveal a higher re-division  $T_{id}$  value for a cell sample taken from a later culturing  
325 point in the stationary phase. Collectively, these results suggest that for each bacterial  
326 cell the duration of its regrowth-lag is apparently related to the status of its cell-pole  
327 granules. In light of this, we hereafter designate the cell-pole granule as the regrowth-  
328 delay body.

329

### 330 **Bacterial cells containing the regrowth-delay bodies are multidrug tolerant**

331       We then assessed whether bacterial cells that contain regrowth-delay bodies are  
332 tolerant to multiple antibiotics, being a major feature attributed to persisters. To this  
333 end, we first compared the antibiotic tolerance capacity of the non-growing cells taken  
334 from different stationary-phase culturing time points. The data clearly show that the



335 bacterial cells derived from a later culturing point, thus possessing a higher level of  
336 aged regrowth-delay bodies, exhibited a significantly higher level of tolerance towards  
337 the two examined antibiotics, either ofloxacin or ampicillin (**Fig. 3E**). More importantly,  
338 our live-cell imaging data provide direct evidence showing that bacterial cells retaining  
339 their regrowth-delay bodies would effectively survive the ampicillin treatment during  
340 the re-culturing process (as represented by the cell circled by red dashed lines in **Fig.**  
341 **3F**). By contrast, cells having their regrowth-delay body dissolved would be efficiently  
342 killed (eventually lysed) under the same reculturing condition (as represented by the  
343 cell circled by white dashed lines in **Fig. 3F**).

344 Collectively, our observations, as shown in **Figs. 2** and **3**, strongly suggest that the  
345 regrowth-delay bodies serve as effectively markers for the non-growing and antibiotic-  
346 tolerant bacterial persisters. It follows that the presence of regrowth-delay bodies would  
347 help us to efficiently identify the tiny subpopulation of persisters present in a large  
348 population of actively growing bacterial cell (as exemplified by the data shown in **Fig.**  
349 **2B**). Our data meanwhile implicate that persister cells are in different depth of  
350 persistence depending on the age of their regrowth-delay bodies.

351

### 352 **The formation of regrowth-delay bodies selectively sequesters multiple key** 353 **proteins**

354 We next attempted to characterize the composition of the regrowth-delay bodies  
355 to learn more about the properties of bacterial persisters. For this goal, we first tried to

356 identify the proteins that are photo-crosslinked to multiple pBpa variants of the FtsZ  
357 protein in the non-growing late stationary phase cells. Specifically, we purified the  
358 photo-crosslinked products of five FtsZ variants with pBpa introduced at residue  
359 position 140 (lane 8 in **Fig. S1B**), 47, 51, 61 or 166 (lanes 10, 12, 16 or 4, respectively,  
360 in **Fig. S5D**), each representing a different pattern of photo-crosslinked products, by  
361 affinity chromatography via the Avi tag fused to the FtsZ protein. The proteins were  
362 identified via mass spectrometry analysis and are listed in **Fig. S8A**.

363 In light that intact regrowth-delay bodies were present in the pellet fraction (as  
364 shown in **Fig. S4C**), we also performed mass spectrometry analysis on the collected  
365 pellet of the lysed wild-type *E. coli* cells, with the major proteins identified being also  
366 listed in **Fig. S8A**. A functional annotation of these identified proteins revealed their  
367 key roles in cell growth (such as translation and transcription) and division, which in  
368 part explains why their sequestering in the regrowth-delay bodies could keep the  
369 bacterial cells in a non-growing state. Of note, some of the proteins (colored blue in  
370 **Fig. S8A**) were identified by both mass spectrometry analyses.

371 We subsequently performed experiments to verify the presence of some of these  
372 identified proteins (other than FtsZ) in the regrowth-delay bodies. We first confirmed  
373 by live-cell imaging analysis that ZapC and FtsA (each being fused to mNeonGreen),  
374 two additional cell division proteins identified, were both clearly detected in the  
375 regrowth-delay bodies as present in the non-growing late stationary-phase cells, though  
376 in the Z-ring structure in actively dividing log-phase cells (**Fig. 4A**). We also

377 demonstrated that FtsA (as fused to the red fluorescent protein mCherry) co-localizes  
378 with FtsZ (as fused to mNeonGreen) in the regrowth-delay bodies present either in  
379 living cells or in the lysates (**Fig. S8B**). By contrast, FtsL and ZapA, two non-identified  
380 cell division proteins, were neither detected in the regrowth-delay bodies, but evenly  
381 distributed in the cytosol in the non-growing late stationary-phase cells, while clearly  
382 detected in the Z-ring structures in actively dividing log-phase cells (**Fig. S8C**).

383 We then verified the apparent presence of five more identified proteins. In  
384 particular, they, each being expressed as an Avi-tagged form and under the control of a  
385 constitutive promoter, were detected to a significant degree in the insoluble pellet  
386 fraction of lysates of the non-growing late stationary-phase cells, though largely present  
387 in the supernatant of lysates of actively dividing log-phase cells (**Fig. 4B**). Interestingly,  
388 among these five proteins, the three that were known to be essential for cell growth (i.e.,  
389 ribosomal protein S5, tryptophan-tRNA ligase, and transcriptional factor sigmaS) were  
390 almost fully detected in the pellet fraction (**Fig. 4B**). Of note, the sigmaS protein is  
391 known to be degraded in actively dividing log-phase cells and accumulates only in non-  
392 growing stationary-phase cells (Zhou and Gottesman, 1998). Taken together, these  
393 protein characterization and verification studies clearly suggest that the regrowth-delay  
394 bodies sequester multiple important proteins that function in cell growth and division,  
395 which in turn conceivably keep the cells in the non-growing persister state.

396 Additionally, we demonstrated by performing live-cell imaging analysis that  
397 similar to FtsZ, FtsA was also reutilized in cells exiting the regrowth-lag and resuming

398 growth (**Fig. 4C**). Specifically, the FtsA protein (fused to mNeonGreen) either  
399 reappeared in the Z-ring structure (shown by the arrow in **Fig. 4C**) of cells that were in  
400 the process of re-dividing or in the inner membrane of cells whose regrowth-delay  
401 bodies were dissolved but not yet dividing as reported before (Pichoff and Lutkenhaus,  
402 2005) when the non-growing late stationary-phase cells were recultured in fresh  
403 medium containing chloramphenicol. Similarly, the FtsA protein was retained in the  
404 regrowth-delay bodies for cells remaining in the non-growing regrowth-lag state (**Fig.**  
405 **4C**, represented by the cell circled by red dashed lines). These results once again  
406 demonstrated that the proteins sequestered in the regrowth-delay bodies are released to  
407 resume their functions in cells exiting the regrowth-lag state and resuming growth.

408

409 **Mutant bacterial cells with a reduced formation of regrowth-delay bodies exhibit**  
410 **a shorter duration of regrowth lag and a lower tolerance to antibiotics**

411 To further examine the relationship between regrowth-delay body formation and  
412 regrowth lag time or antibiotic tolerance, we then attempted to generate mutant  
413 bacterial cells in which the formation of regrowth-delay bodies would be significantly  
414 reduced. Towards this goal, we referred to the list of proteins identified in the regrowth-  
415 delay bodies (as shown in **Fig. S8A**) and realized the presence of multiple subunits of  
416 the respiratory chain complexes. Furthermore, our live-cell imaging analysis (**Fig. S4A**)  
417 showed an apparent association of the regrowth-delay bodies with the inner membrane,  
418 where the respiratory chain complexes are located. In light of these observations, we

419 then performed gene knockdown (or gene knockout) experiments to decrease or remove  
420 certain subunits of the respiratory chain complexes and analyzed whether the regrowth-  
421 delay body formation in the bacterial cells was significantly reduced. In particular, the  
422 *nuoA* gene (encoding a subunit of respiratory chain complex I) or the *sdhC* gene  
423 (encoding a subunit of respiratory chain complex II) in the *ftsZ-mNeonGreen* cells was  
424 subjected to knockdown manipulation using the CRISPRi technology (Luo et al., 2015).

425 Our live-cell imaging analysis (Fig. 5A, left panel) demonstrated that the  
426 regrowth-delay body formation was significantly reduced in the non-growing late  
427 stationary-phase *nuoA*-knockdown cells and barely occurred in the *sdhC*-knockdown  
428 cells. In agreement with these imaging results, our immunoblotting analysis confirmed  
429 a significantly reduced amount of the endogenous FtsZ in the insoluble lysate pellet  
430 fraction of these cells, instead, much appeared in the soluble supernatant fraction (Fig.  
431 5A, right panel). We observed similar reduction in regrowth-delay body formation  
432 (shown in Fig. S9A) for the bacterial cells in which the *nouAB* (genes encoding two  
433 subunits of respiratory chain complex I) or *sdhCDAB* (genes encoding all the four  
434 subunits of the respiratory chain complex II) were knocked out. Taken together, these  
435 observations indicate that the respiratory chain complexes somehow do play an  
436 important role for the formation of regrowth-delay bodies.

437 In agreement with our hypothesis, we observed that the re-division  $T_{id}$  value of  
438 either the *nuoA* or *sdhC* knockdown cells was significantly lower in comparison with  
439 that of the control cells (Figs. 5B). Additionally, the re-division  $T_{id}$  values became

440 comparable for the early and late stationary-phase *sdhC* knockdown cells, unlike those  
441 for the control cells (**Fig. 5B**). Consistently, the survival rates of these non-growing late  
442 stationary-phase cells became significantly lower than those of the control cells after  
443 being treated with an antibiotic, ofloxacin or ampicillin (**Fig. 5C**). These observations  
444 on the gene knockdown cells further strengthened our conclusion that bacterial cells  
445 exhibit a prominent regrowth lag and antibiotic tolerance due to the formation of  
446 regrowth-delay bodies.

447

448 **Regrowth-delay body formation occurs in pathogenic bacteria and also correlates**  
449 **to the regrowth-lag and multidrug tolerance**

450 We subsequently demonstrated the formation of regrowth-delay bodies in such  
451 pathogenic bacteria as *Salmonella* Typhimurium and *Shigella flexneri*, which  
452 respectively cause gastroenteritis and diarrhea in humans (Graham, 2002; Jennison and  
453 Verma, 2004). In particular, we observed a similar time-dependent appearance of the  
454 endogenous FtsZ in the lysate pellet of non-growing late stationary-phase cells for  
455 either *Salmonella* Typhimurium SL1344 or *Shigella flexneri* serotype 2a 2457T (**Fig.**  
456 **6A**). For each strain, we then observed a similar correlation between a higher degree of  
457 regrowth-delay body formation and a longer regrowth lag time (**Fig. 6B** and **Fig. S10**)  
458 or a higher level of antibiotic tolerance (**Fig. 6C**). These observations again indicate  
459 that regrowth-delay body formation likely attributes to the regrowth lag and antibiotic  
460 tolerance in bacterial persister cells.

## 461 **DISCUSSION**

462 Here, we reported our accidental discovery of a hitherto unreported bacterial  
463 subcellular structure that we designated as the regrowth-delay body. In retrospect, we  
464 made this revelation as a result of our initial *in vivo* protein photo-crosslinking and  
465 subsequent live-cell imaging analyses on the unique FtsZ protein, not only with actively  
466 dividing cells (as have been extensively examined by others), but also with the non-  
467 dividing/non-growing cells (as have been rarely examined by others). We provided  
468 ample evidence to support our conclusion that the regrowth-delay bodies are formed by  
469 sequestering multiple key cellular proteins, which in turn enable bacterial cells to enter  
470 a persister state, which exhibits not only a regrowth lag but also a multidrug tolerance.

471 Regrowth-delay body represents a distinctive subcellular structure that allows the  
472 tiny subpopulation of persisters to be effectively identified in a large population of  
473 actively growing cells, a prerequisite for elucidating their physiological properties.  
474 Meanwhile, our demonstration that regrowth-delay bodies sequesters multiple key  
475 cellular proteins provides key mechanistic insights for explaining why persisters are  
476 able to maintain in a non-growing dormant state for an extended period of time, being  
477 an outstanding unresolved puzzle in microbiology.

478 Importantly, our findings imply that a bacterial persister is actually in a  
479 particular depth of persistence, as determined by the status of its regrowth-delay bodies.  
480 In other words, a persister whose regrowth-delay bodies are to be dissolved rather  
481 effectively is in a shallow persistent state, thus to exhibit a relatively short regrowth lag

482 whenever as an optimal growth condition becomes available. Conversely, a persister  
483 whose regrowth-delay bodies are to be maintained for an extended period of time even  
484 when an optimal growth condition becomes available is in a deep persistent state.  
485 According to this, a conventional multidrug-tolerant persister represents a bacterial cell  
486 that is in deep persistence, or a metabolically inactive dormant state.

487       Having cells in different depths of persistence would conceivably allow certain  
488 number of persister cells to survive under any harmful condition. This explains how the  
489 formation of regrowth-delay bodies would provide an effective bet-hedging strategy  
490 for a bacterial species to maximize its possibility of survival in the highly unpredictable  
491 natural environment (Kell et al., 2015; Maisonneuve and Gerdes, 2014; Veening et al.,  
492 2008). In a sense, the regrowth-delay bodies in a persister cell function as the biological  
493 timer that determines the particular duration of the regrowth lag for the non-growing  
494 bacterial cell to resume growth

495       Our revelations also explain why the formation of persisters has long been viewed  
496 as a stochastic or heterogeneous phenomenon occurring in the bacterial cell populations  
497 (Allison et al., 2011; Gefen and Balaban, 2009; Amato and Brynildsen, 2015; Dhar and  
498 McKinney, 2007). This is mainly due to the high heterogeneity of regrowth-delay body  
499 formation in different individual cells as well as the progressive nature of their  
500 formation in each single cell. Because of this, a bacterial cell sample taken from  
501 different culturing point would be highly heterogeneous in regards of the status of the  
502 cellular regrowth-delay bodies or depth of persistence in different cells. It follows that



503 the duration of the regrowth lag, the level of drug tolerance, as well as the percentage  
504 of cells defined as persisters (by measuring the number of colony-forming units after  
505 treating an antibiotic) in the cell population, would most likely appear as inconsistent  
506 or stochastic values even in repeating experiments.

507 One difficulty in studying the persister cells is to unequivocally identify them, as  
508 they usually exist in extremely small numbers in a cell population that are actively  
509 growing (Balaban et al., 2013). The presence of the distinctive regrowth-delay bodies  
510 in persisters would prove to be greatly helpful in overcoming this difficulty (as  
511 exemplified by the data shown in **Fig. 2C**). This meanwhile may allow us to conduct  
512 single cell biochemistry and cell biology studies on persisters, including a  
513 characterization of the transcriptomes, proteome and metabolome (Kell et al., 2015;  
514 Taniguchi et al., 2010).

515 In light of our findings described here, the “viable but non-culturable” bacteria,  
516 which is known to evade the conventional culture-based microbiological detection  
517 (Pinto et al., 2015), may represent persister cells whose regrowth-delay bodies could  
518 not effectively dissolve under the commonly applied culturing conditions. After we  
519 learn more about the conditions that will effectively promote the dissolution of  
520 regrowth-delay bodies, we may be able to make these bacterial cells culturable under  
521 particular conditions. By the same token, in clinics, we might be able to find ways to  
522 eradicate the multidrug tolerant recalcitrant pathogen persisters by promoting the  
523 dissolution of their regrowth-delay bodies in conjunction with an antibiotic treatment.

524        However, many questions remain unanswered concerning the biology of regrowth-  
525        delay bodies, as a new subcellular structure marking the non-growing persister bacterial  
526        cells. First, how are the components in the regrowth-delay bodies organized (to be  
527        revealed likely by high resolution electron microscopic analysis)? Second, what are the  
528        key signaling molecules that trigger their formation, and how are such signals sensed  
529        by cells? Third, how are the specifically sequestered proteins selected? Fourth, what  
530        signals trigger the regrowth-delay bodies to dissolve? Finally, do structures similar to  
531        regrowth-delay bodies exist in eukaryotes, especially those living as single-cell forms?  
532

### 533        **Author Contributions**

534        Jiayu Yu and Yang Liu designed and performed the major experiments, analyzed  
535        the data, and drafted the manuscript. Huijia Yin designed and performed part of the  
536        experiments. Prof. Zengyi Chang supervised the entirety of the study.

### 537        **Acknowledgments**

538        We thank Prof. Harold Erickson (Duke University, USA) for providing us the  
539        pJSB100 plasmid, and Prof. Peter Schultz (The Scripps Research Institute, USA) for  
540        providing us with the plasmids that carry the genes encoding the orthogonal tRNA and  
541        orthogonal amino acyl-tRNA for pBpa incorporation. We thank Keio Collections for  
542        providing us the wild-type *E. coli* strain. We thank Dr. Xiaoyun Liu (Peking University,  
543        China) for providing the *Salmonella* Typhimurium and *Shigella flexneri* strains. We  
544        thank the Core Facilities at the School of Life Sciences, Peking University, for

545 assistance using the structured illumination microscope (SIM), and we are grateful to  
546 Dr. Chunyan Shan and Dr. Xiaochen Li for assisting us with the fluorescence  
547 microscopic imaging analysis. We thank Dr. Wen Zhou at the Mass Spectrometry  
548 Facility of the National Center for Protein Sciences at Peking University for assistance  
549 on the mass spectrometry analysis. We thank Prof. Chong Liu from Zhejiang University  
550 and Prof. Xinmiao Fu from Fujian Normal University for useful discussions. This work  
551 was supported by funds from the National Natural Science Foundation of China (No.  
552 31670775 and 31470766 to ZYC), the National Basic Research Program of China (No.  
553 2012CB917300 to ZYC), and the Qidong-SLS Innovation Fund. We declare that we  
554 have no conflicts of interest related to this work.

## 555 **References**

- 556 Adams, D.W., and Errington, J. (2009). Bacterial cell division: assembly,  
557 maintenance and disassembly of the Z ring. *Nat. Rev. Microbiol.* 7, 642–653.
- 558 Allison, K.R., Brynildsen, M.P., and Collins, J.J. (2011). Heterogeneous bacterial  
559 persisters and engineering approaches to eliminate them. *Curr. Opin. Microbiol.*  
560 14, 593–598.
- 561 Amato, S.M., and Brynildsen, M.P. (2015). Persister Heterogeneity Arising from a  
562 Single Metabolic Stress. *Curr. Biol.* 25, 2090–2098.
- 563 Ayrapetyan, M., Williams, T.C., and Oliver, J.D. (2015). Bridging the gap between  
564 viable but non-culturable and antibiotic persistent bacteria. *Trends Microbiol.* 23,  
565 7–13.
- 566 Baba, T., Ara, T., Hasegawa, M., Takai, Y., Okumura, Y., Baba, M., Datsenko, K.A.,  
567 Tomita, M., Wanner, B.L., and Mori, H. (2006). Construction of *Escherichia coli*  
568 K-12 in-frame, single-gene knockout mutants: the Keio collection. *Mol. Syst.*  
569 *Biol.* 2, 2006.0008.
- 570 Balaban, N.Q., Merrin, J., Chait, R., Kowalik, L., and Leibler, S. (2004). Bacterial  
571 persistence as a phenotypic switch. *Science* 305, 1622–1625.
- 572 Balaban, N.Q., Gerdes, K., Lewis, K., and McKinney, J.D. (2013). A problem of  
573 persistence: still more questions than answers? *Nat. Rev. Microbiol.* 11, 587–591.

- 574 Beech, P.L., Nheu, T., Schultz, T., Herbert, S., Lithgow, T., Gilson, P.R., and  
575 McFadden, G.I. (2000). Mitochondrial FtsZ in a chromophyte alga. *Science* 287,  
576 1276–1279.
- 577 Bigger, J. (1944). Treatment of Staphylococcal infections with penicillin by  
578 intermittent sterilisation. *The Lancet* 244, 497–500.
- 579 Black, D.S., Kelly, A.J., Mardis, M.J., and Moyed, H.S. (1991). Structure and  
580 organization of hip, an operon that affects lethality due to inhibition of  
581 peptidoglycan or DNA synthesis. *J. Bacteriol.* 173, 5732–5739.
- 582 Black, D.S., Irwin, B., and Moyed, H.S. (1994). Autoregulation of hip, an operon that  
583 affects lethality due to inhibition of peptidoglycan or DNA synthesis. *J. Bacteriol.*  
584 176, 4081–4091.
- 585 Blattner, F.R., Plunkett, G., Bloch, C.A., Perna, N.T., Burland, V., Riley, M.,  
586 Collado-Vides, J., Glasner, J.D., Rode, C.K., Mayhew, G.F., et al. (1997). The  
587 complete genome sequence of *Escherichia coli* K-12. *Science* 277, 1453–1462.
- 588 Burke, V., Sprague, A., and Barnes, L.V. (1925). Dormancy In Bacteria. *J. Infect.*  
589 *Dis.* 36, 555–560.
- 590 Chesney, A.M. (1916). The latent period in the growth of bacteria. *J. Exp. Med.* 24,  
591 387–418.
- 592 Chin, J.W., Martin, A.B., King, D.S., Wang, L., and Schultz, P.G. (2002). Addition of  
593 a photocrosslinking amino acid to the genetic code of *Escherichiacoli*. *Proc. Natl.*  
594 *Acad. Sci. U. S. A.* 99, 11020–11024.
- 595 Chowdhury, N., Kwan, B.W., and Wood, T.K. (2016). Persistence Increases in the  
596 Absence of the Alarmone Guanosine Tetrphosphate by Reducing Cell Growth.  
597 *Sci. Rep.* 6.
- 598 Conter, A., Bouché, J.P., and Dassain, M. (1996). Identification of a new inhibitor of  
599 essential division gene *ftsZ* as the *kil* gene of defective prophage *Rac*. *J. Bacteriol.*  
600 178, 5100–5104.
- 601 Coplans, M. (1910). Influences affecting the growth of microorganisms—latency:  
602 Inhibition: Mass action. *J. Pathol. Bacteriol.* 14, 1–27.
- 603 Dai, K., and Lutkenhaus, J. (1991). *ftsZ* is an essential cell division gene in  
604 *Escherichia coli*. *J. Bacteriol.* 173, 3500–3506.
- 605 Dhar, N., and McKinney, J.D. (2007). Microbial phenotypic heterogeneity and  
606 antibiotic tolerance. *Curr. Opin. Microbiol.* 10, 30–38.
- 607 Durand-Heredia, J.M., Yu, H.H., De Carlo, S., Lesser, C.F., and Janakiraman, A.  
608 (2011). Identification and Characterization of ZapC, a Stabilizer of the FtsZ Ring  
609 in *Escherichia coli*. *J. Bacteriol.* 193, 1405–1413.
- 610 Erickson, H.P., Anderson, D.E., and Osawa, M. (2010). FtsZ in Bacterial Cytokinesis:  
611 Cytoskeleton and Force Generator All in One. *Microbiol. Mol. Biol. Rev.* 74,  
612 504–528.
- 613 Fisher, R.A., Gollan, B., and Helaine, S. (2017). Persistent bacterial infections and  
614 persister cells. *Nat. Rev. Microbiol.* 15, nrmicro.2017.42.

- 615 Fishov, I., and Woldringh, C.L. (1999). Visualization of membrane domains in  
616 *Escherichia coli*. *Mol. Microbiol.* 32, 1166–1172.
- 617 Fu, X., Shi, X., Yan, L., Zhang, H., and Chang, Z. (2013). In Vivo Substrate Diversity  
618 and Preference of Small Heat Shock Protein IbpB as Revealed by Using a  
619 Genetically Incorporated Photo-cross-linker. *J. Biol. Chem.* 288, 31646–31654.
- 620 Gefen, O., and Balaban, N.Q. (2009). The importance of being persistent:  
621 heterogeneity of bacterial populations under antibiotic stress. *FEMS Microbiol.*  
622 *Rev.* 33, 704–717.
- 623 Ghigo, J.M., and Beckwith, J. (2000). Cell division in *Escherichia coli*: role of FtsL  
624 domains in septal localization, function, and oligomerization. *J. Bacteriol.* 182,  
625 116–129.
- 626 Graham, S.M. (2002). Salmonellosis in children in developing and developed  
627 countries and populations. *Curr. Opin. Infect. Dis.* 15, 507–512.
- 628 Guan, F., Yu, J., Yu, J., Liu, Y., Li, Y., Feng, X.-H., Huang, K.C., Chang, Z., and Ye,  
629 S. (2018). Lateral interactions between protofilaments of the bacterial tubulin  
630 homolog FtsZ are essential for cell division. *ELife* 7.
- 631 Haeusser, D.P., and Margolin, W. (2016). Splitsville: structural and functional  
632 insights into the dynamic bacterial Z ring. *Nat. Rev. Microbiol.* 14, 305–319.
- 633 Heller, D.M., Tavag, M., and Hochschild, A. (2017). CbtA toxin of *Escherichia coli*  
634 inhibits cell division and cell elongation via direct and independent interactions  
635 with FtsZ and MreB. *PLOS Genet.* 13, e1007007.
- 636 Jennison, A.V., and Verma, N.K. (2004). *Shigella flexneri* infection: pathogenesis and  
637 vaccine development. *FEMS Microbiol. Rev.* 28, 43–58.
- 638 Jiafeng, L., Fu, X., and Chang, Z. (2015). Hypoionic shock treatment enables  
639 aminoglycosides antibiotics to eradicate bacterial persisters. *Sci. Rep.* 5.
- 640 Kaldalu, N., Hauryliuk, V., and Tenson, T. (2016). Persisters—as elusive as ever.  
641 *Appl. Microbiol. Biotechnol.* 100, 6545–6553.
- 642 Kaprelyants, A.S., Gottschal, J.C., and Kell, D.B. (1993). Dormancy in non-  
643 sporulating bacteria. *FEMS Microbiol. Rev.* 10, 271–285.
- 644 Kell, D., Potgieter, M., and Pretorius, E. (2015). Individuality, phenotypic  
645 differentiation, dormancy and ‘persistence’ in culturable bacterial systems:  
646 commonalities shared by environmental, laboratory, and clinical microbiology.  
647 *F1000Research* 4.
- 648 Korch, S.B., Henderson, T.A., and Hill, T.M. (2003). Characterization of the *hipA7*  
649 allele of *Escherichia coli* and evidence that high persistence is governed by  
650 (p)ppGpp synthesis: Persistence and (p)ppGpp synthesis in *E. coli*. *Mol.*  
651 *Microbiol.* 50, 1199–1213.
- 652 Kwiatkowska, J., Matuszewska, E., Kuczyńska-Wiśnik, D., and Laskowska, E.  
653 (2008). Aggregation of *Escherichia coli* proteins during stationary phase depends  
654 on glucose and oxygen availability. *Res. Microbiol.* 159, 651–657.

- 655 Lee, D.J., Bingle, L.E.H., Heurlier, K., Pallen, M.J., Penn, C.W., Busby, S.J.W., and  
656 Hobman, J.L. (2009). Gene doctoring: a method for recombineering in laboratory  
657 and pathogenic *Escherichia coli* strains. *BMC Microbiol.* 9, 252.
- 658 Leszczynska, D., Matuszewska, E., Kuczynska-Wisnik, D., Furmanek-Blaszczak, B., and  
659 Laskowska, E. (2013). The Formation of Persister Cells in Stationary-Phase  
660 Cultures of *Escherichia coli* Is Associated with the Aggregation of Endogenous  
661 Proteins. *PLoS ONE* 8, e54737.
- 662 Lewis, K. (2007). Persister cells, dormancy and infectious disease. *Nat. Rev.*  
663 *Microbiol.* 5, 48–56.
- 664 Lewis, K. (2010). Persister Cells. *Annu. Rev. Microbiol.* 64, 357–372.
- 665 Lindner, A.B., Madden, R., Demarez, A., Stewart, E.J., and Taddei, F. (2008).  
666 Asymmetric segregation of protein aggregates is associated with cellular aging  
667 and rejuvenation. *Proc. Natl. Acad. Sci. U. S. A.* 105, 3076–3081.
- 668 Löwe, J., and Amos, L.A. (1998). Crystal structure of the bacterial cell-division  
669 protein FtsZ. *Nature* 391, 203–206.
- 670 Luo, M.L., Mullis, A.S., Leenay, R.T., and Beisel, C.L. (2015). Repurposing  
671 endogenous type I CRISPR-Cas systems for programmable gene repression.  
672 *Nucleic Acids Res.* 43, 674–681.
- 673 Ma, X., Ehrhardt, D.W., and Margolin, W. (1996). Colocalization of cell division  
674 proteins FtsZ and FtsA to cytoskeletal structures in living *Escherichia coli* cells by  
675 using green fluorescent protein. *Proc. Natl. Acad. Sci.* 93, 12998–13003.
- 676 Maisonneuve, E., and Gerdes, K. (2014). Molecular mechanisms underlying bacterial  
677 persisters. *Cell* 157, 539–548.
- 678 Maisonneuve, E., Ezraty, B., and Dukan, S. (2008). Protein Aggregates: an Aging  
679 Factor Involved in Cell Death. *J. Bacteriol.* 190, 6070–6075.
- 680 McDermott, W. (1958). Microbial persistence., *Microbial Persistence.* *Yale J. Biol.*  
681 *Med.* *Yale J. Biol. Med.* 30, 30, 257, 257–291.
- 682 Monod, J. (1949). The Growth of Bacterial Cultures. *Annu. Rev. Microbiol.* 3, 371–  
683 394.
- 684 Moyed, H.S., and Bertrand, K.P. (1983). *hipA*, a Newly Recognized Gene of  
685 *Escherichia coli* K-12 That Affects Frequency of Persistence After Inhibition of  
686 Murein Synthesis. 8.
- 687 Mukherjee, A., and Lutkenhaus, J. (1998). Purification, assembly, and localization of  
688 FtsZ. *Methods Enzymol.* 298, 296–305.
- 689 Orman, M.A., and Brynildsen, M.P. (2015). Inhibition of stationary phase respiration  
690 impairs persister formation in *E. coli*. *Nat. Commun.* 6, 7983.
- 691 Pichoff, S., and Lutkenhaus, J. (2005). Tethering the Z ring to the membrane through  
692 a conserved membrane targeting sequence in FtsA. *Mol. Microbiol.* 55, 1722–  
693 1734.
- 694 Pinto, D., Santos, M.A., and Chambel, L. (2015). Thirty years of viable but  
695 nonculturable state research: unsolved molecular mechanisms. *Crit. Rev.*  
696 *Microbiol.* 41, 61–76.

697 Rolfe, M.D., Rice, C.J., Lucchini, S., Pin, C., Thompson, A., Cameron, A.D.S.,  
698 Alston, M., Stringer, M.F., Betts, R.P., Baranyi, J., et al. (2012). Lag phase is a  
699 distinct growth phase that prepares bacteria for exponential growth and involves  
700 transient metal accumulation. *J. Bacteriol.* 194, 686–701.

701 Roszak, D.B., and Colwell, R.R. (1987). Survival strategies of bacteria in the natural  
702 environment. *Microbiol. Rev.* 51, 365–379.

703 Rowlett, V.W., and Margolin, W. (2015). The bacterial divisome: ready for its close-  
704 up. *Philos. Trans. R. Soc. B Biol. Sci.* 370, 20150028.

705 Taniguchi, Y., Choi, P.J., Li, G.-W., Chen, H., Babu, M., Hearn, J., Emili, A., and  
706 Xie, X.S. (2010). Quantifying *E. coli* Proteome and Transcriptome with Single-  
707 Molecule Sensitivity in Single Cells. 329, 8.

708 TerBush, A.D., Yoshida, Y., and Osteryoung, K.W. (2013). FtsZ in chloroplast  
709 division: structure, function and evolution. *Curr. Opin. Cell Biol.* 25, 461–470.

710 Veening, J.-W., Smits, W.K., and Kuipers, O.P. (2008). Bistability, Epigenetics, and  
711 Bet-Hedging in Bacteria. *Annu. Rev. Microbiol.* 62, 193–210.

712 Winkler, J., Seybert, A., König, L., Pruggnaller, S., Haselmann, U., Sourjik, V.,  
713 Weiss, M., Frangakis, A.S., Mogk, A., and Bukau, B. (2010). Quantitative and  
714 spatio-temporal features of protein aggregation in *Escherichia coli* and  
715 consequences on protein quality control and cellular ageing. *EMBO J.* 29, 910–  
716 923.

717 Xu, H.S., Roberts, N., Singleton, F.L., Attwell, R.W., Grimes, D.J., and Colwell, R.R.  
718 (1982). Survival and viability of nonculturable *Escherichia coli* and *Vibrio cholerae*  
719 in the estuarine and marine environment. *Microb. Ecol.* 8, 313–323.

720 Zhang, M., Lin, S., Song, X., Liu, J., Fu, Y., Ge, X., Fu, X., Chang, Z., and Chen,  
721 P.R. (2011). A genetically incorporated crosslinker reveals chaperone cooperation  
722 in acid resistance. *Nat. Chem. Biol.* 7, 671–677.

723 Zhou, Y., and Gottesman, S. (1998). Regulation of Proteolysis of the Stationary-Phase  
724 Sigma Factor RpoS. *J. Bacteriol.* 180, 1154–1158.

725  
726  
727  
728  
729  
730  
731  
732  
733  
734  
735  
736  
737  
738

739 **Figure Legends**

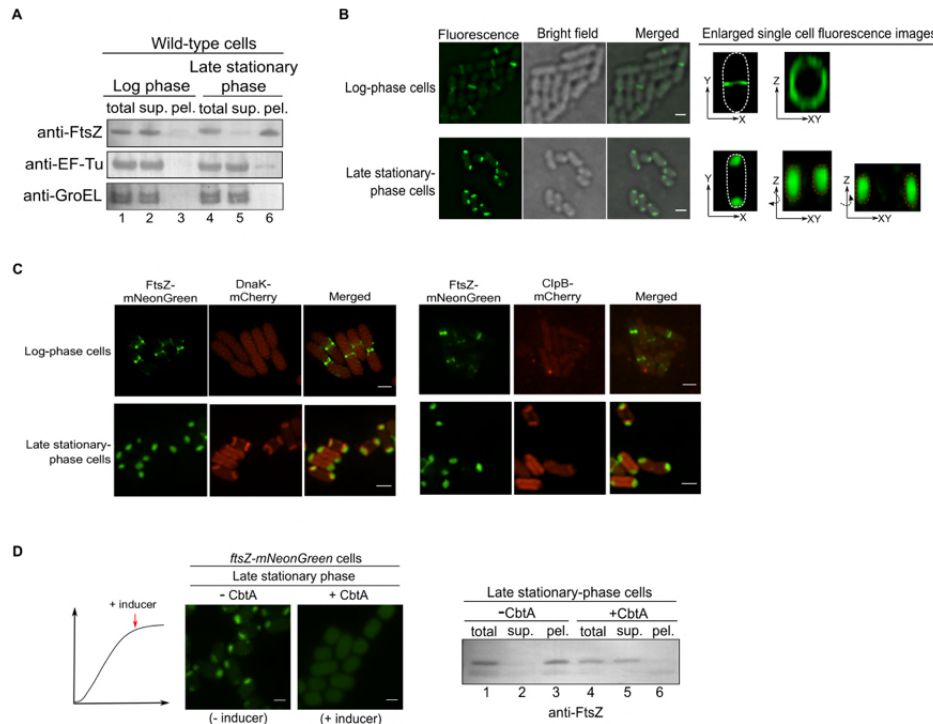

740

741 **Figure 1. The cell division protein FtsZ in non-growing bacterial cells exists in a**

742 **hitherto unreported cell-pole granule as a folded form .**

743 **(A)** Immunoblotting results for detecting endogenous FtsZ, EF-Tu, or GroEL in the

744 total cell lysate (total), supernatant (sup.) and pellet (pel.) of the actively dividing log-

745 phase or the non-growing late stationary-phase wild-type *E. coli* cells, probed with the

746 indicated antibodies. (See also **Fig. S1**)

747 **(B)** Fluorescence and bright field microscopic images of the actively dividing log-phase

748 (top) and the non-growing late stationary-phase (bottom) *E. coli* cells in which FtsZ-

749 mNeonGreen was heterologously expressed. Scale bars, 1  $\mu$ m. (See also **Figs. S2, S3**)



750 (C) Fluorescence microscopic images of the actively dividing log-phase (top) and the  
751 non-growing late stationary-phase (bottom) *ftsZ-mNeonGreen-dnaK-mCherry* or *ftsZ-*  
752 *mNeonGreen-clpB-mCherry* cells. Scale bars, 1  $\mu$ m.

753 (D) Fluorescence microscopic images of the non-growing late stationary-phase *ftsZ-*  
754 *mNeonGreen* cells in which the FtsZ inhibitor protein CbtA was expressed (left); the  
755 corresponding immunoblotting results for detecting FtsZ in the indicated cell lysate  
756 fractions, probed with anti-FtsZ antibodies (right). Scale bars, 1  $\mu$ m. (See also Fig.  
757 S4B-C)

758

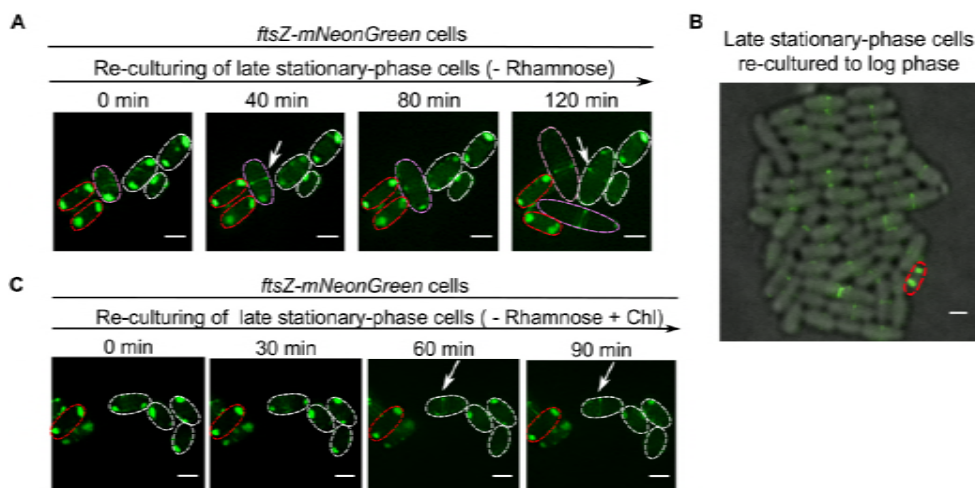

759

760 **Figure 2. When the non-growing cells exit their regrowth lag, the cell-pole**  
761 **granules dissolve to release the FtsZ for re-functioning, but maintain unaltered**  
762 **otherwise.**

763 (A) Fluorescence microscopic images of re-cultured non-growing late stationary-  
764 phase *ftsZ-mNeonGreen* cells present in fresh LB medium lacking rhamnose, as

765 obtained at the indicated time points. Note: one of the examined cells divided into two  
766 daughter cells at 120 min (circled by pink dashed lines). Scale bars, 1  $\mu\text{m}$ .

767 **(B)** Fluorescence microscopic images of the non-growing late stationary-phase *ftsZ*-  
768 *mNeonGreen* cells re-cultured to the log phase ( $\text{OD}_{600} \sim 0.5$ ) in liquid LB medium  
769 lacking rhamnose. Scale bar, 1  $\mu\text{m}$ .

770 **(C)** Fluorescence microscopic images of the non-growing late stationary-phase *ftsZ*-  
771 *mNeonGreen* cells re-cultured to the indicated time points in fresh LB medium that  
772 lacked rhamnose and contained the antibiotic chloramphenicol. Scale bars, 1  $\mu\text{m}$ . (See  
773 also **Fig. S5**)

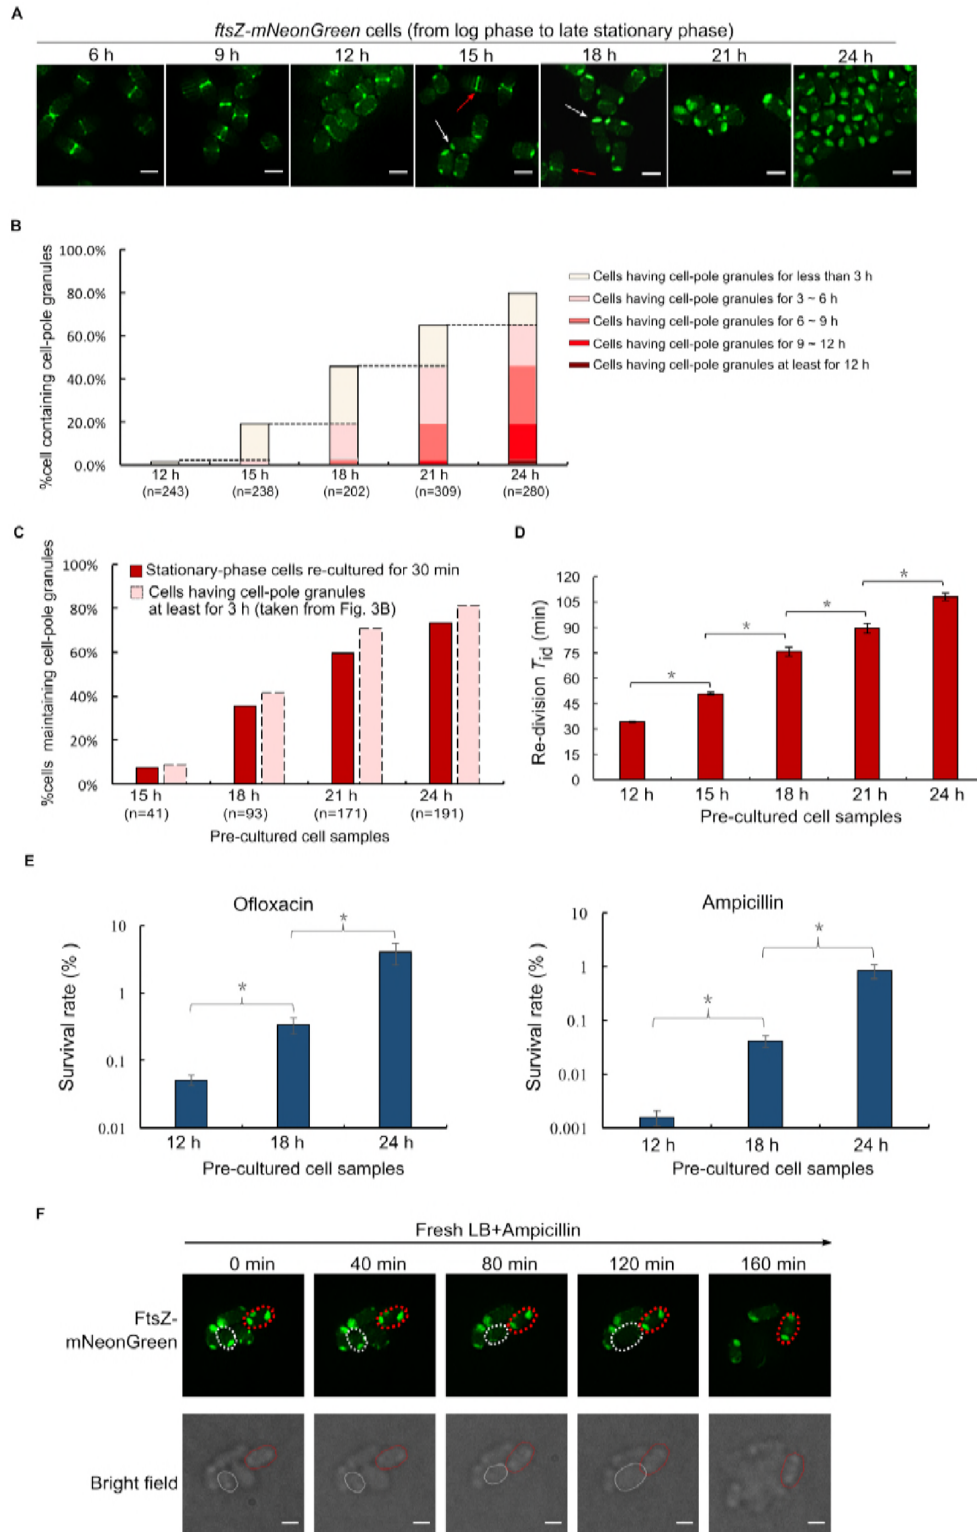

774

775 **Figure 3. The regrowth-delay bodies are formed in a highly progressive in each**

776 **individual cell and heterogeneous manner and in the cell population; the degree**

777 **of their formation correlates with the duration of the regrowth lag time and the**  
778 **level of multidrug tolerance for a cell population.**

779 **(A)** Fluorescence microscopic images of *ftsZ-mNeonGreen* cells cultured to the  
780 indicated time points in LB medium containing 0.02% rhamnose (to induce the  
781 production of FtsZ-mNeonGreen). Scale bars, 1  $\mu\text{m}$ .

782 **(B)** Percentage of cells possessing regrowth-delay bodies within those cultured to the  
783 indicated time points (as shown in **A**). The values are shown in an accumulative manner  
784 (i.e., earlier values to be included in later values).

785 **(C)** Percentages of cells maintaining their regrowth-delay bodies when the particular  
786 non-growing stationary-phase cell samples were re-cultured for 30 min in fresh medium  
787 containing chloramphenicol (red columns). Percentages of cells containing regrowth-  
788 delay bodies for more than 3 hours (pink columns) were directly taken from **Fig. 3B** to  
789 indicate their best fit matches as indicated by regression analysis.

790 **(D)** Re-division  $T_{\text{id}}$  (the average initial doubling time) values of wild-type cells that  
791 were pre-cultured to the indicated time points. The  $T_{\text{id}}$  values were calculated based on  
792 the increase in cell numbers within the first 30 min of re-culturing (after diluting 40-  
793 fold) in fresh medium at 37°C (for details, see Methods). (See also **Fig. S6**)

794 **(E)** Survival rates of the indicated re-cultured non-growing stationary-phase wild-type  
795 cells that were treated with ofloxacin (5  $\mu\text{g/ml}$ ) or ampicillin (200  $\mu\text{g/ml}$ ) for 2 h (in  
796 fresh LB medium at 37°C). The survival rates were calculated according to the equation:

797 [colony-forming units (CFU) of the antibiotic-treated cells] / [colony-forming units of  
798 the untreated cells] ×100.

799 **(F)** Live-cell fluorescence (top) and bright field (bottom) microscopic images of the re-  
800 cultured non-growing late stationary-phase *ftsZ-mNeonGreen* cells in the fresh  
801 ampicillin-containing LB medium (at 37°C), as obtained at the indicated time points.

802 One representative cell that exited (eventually became lysed) or maintained (unaltered)  
803 the regrowth lag is indicated by the white or red dashed circle, respectively. Scale bars,  
804 1 μm.

805 The symbol \* in **(D)**, **(E)** and **(C)** denotes a significant difference between the compared  
806 pair of samples (*P*-value <0.05, *t*-test). At least three biological replicates were  
807 analyzed in obtaining each value.

808

809

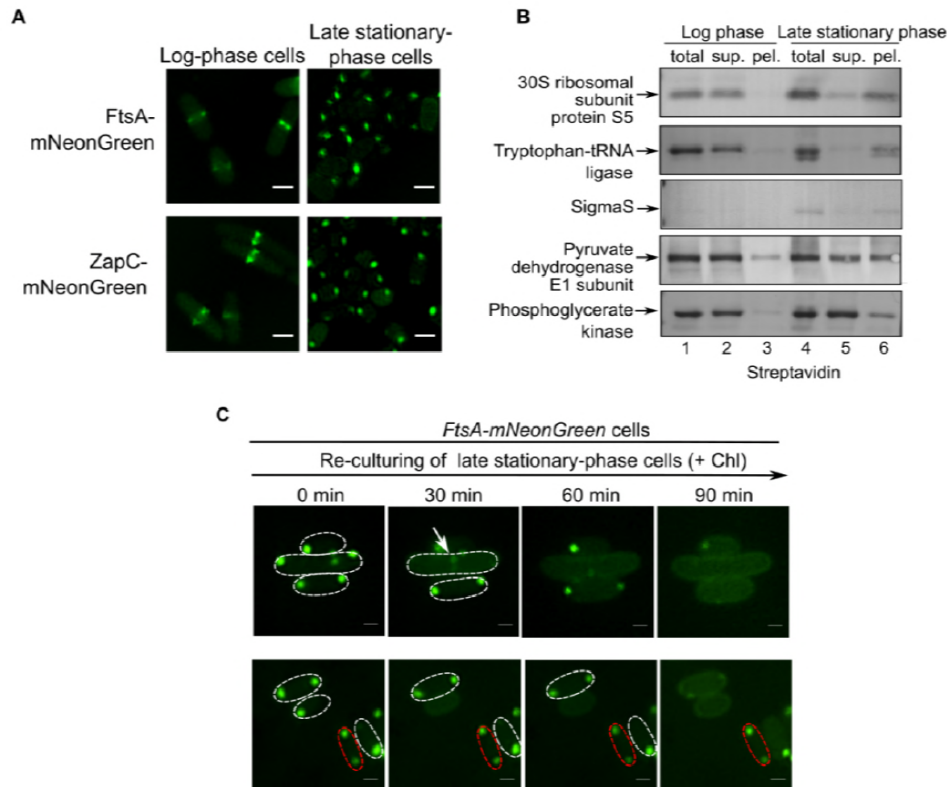

810

811 **Figure 4. Regrowth-delay bodies selectively sequester multiple other key proteins**  
812 **that are released to re-function when cells exit their regrowth lag and resume**  
813 **growth.**

814 (A) Fluorescence microscopic images of actively dividing log-phase (left) and non-  
815 growing late stationary-phase (right) *E. coli* cells in which mNeonGreen-fused cell  
816 division FtsA or ZapC (both being identified in the regrowth-delay bodies by mass  
817 spectrometry analysis, as shown in Fig. S7A) was expressed from a plasmid under the  
818 control of a constitutive promoter. Scale bars, 1  $\mu$ m. (See also Figs. S7A and S7B)

819 (B) Blotting results to analyze the indicated Avi-tagged proteins (all being identified in  
820 the regrowth-delay bodies by mass spectrometry analysis, as shown in Fig. S7A, and  
821 each being expressed from a plasmid under the control of a constitutive promoter) in

822 the indicated lysate fractions of actively dividing log-phase or non-growing late  
 823 stationary-phase wild-type cells, probed with streptavidin-AP.

824 (C) Fluorescence microscopic images of two fields of re-cultured non-growing late  
 825 stationary-phase cells, in which FtsA-mNeonGreen was expressed from a plasmid  
 826 under the control of a constitutive promoter, in fresh medium containing  
 827 chloramphenicol, obtained at the indicated time points. Scale bars, 1  $\mu$ m.

828

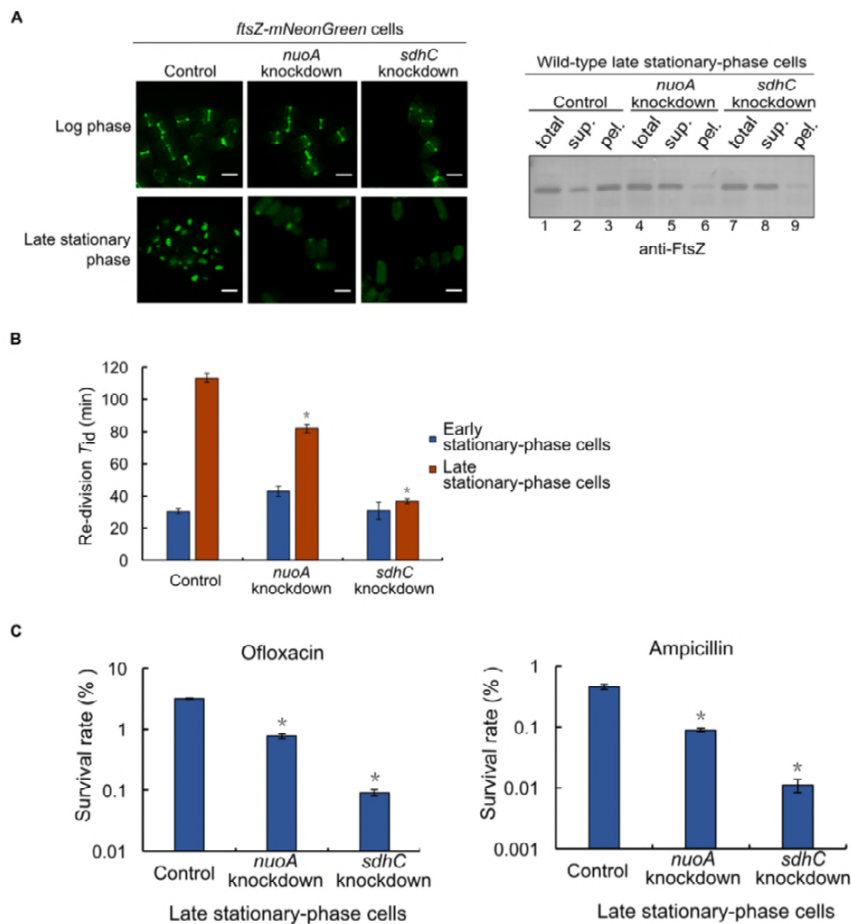

829

830 **Figure 5. Mutant bacterial cells with a reduced formation of regrowth-delay**  
 831 **bodies exhibit a shorter duration of regrowth lag as well as a lower tolerance to**  
 832 **antibiotics.**

833 **(A)** Fluorescence microscopic images of actively dividing log-phase or non-growing  
834 late stationary-phase *ftsZ-mNeonGreen* cells having a knockdown of either the *nuoA* or  
835 the *sdhC* gene. Cells expressing a non-targeting CRISPR RNA were analyzed as the  
836 control, scale bars, 1  $\mu\text{m}$  (left panel); The immunoblotting results for detecting FtsZ in  
837 the indicated cell lysate fractions, as probed with anti-FtsZ antibodies (right panel).

838 (See also [Fig. S8A](#))

839 **(B)** Re-division  $T_{\text{id}}$  values of early (blue bars; cultured to 12 h) or late (red bars; cultured  
840 to 24 h) non-growing stationary-phase cells of the indicated gene-knockdown strain.  
841 Here wild-type cells in which a non-targeting crRNA was expressed from a plasmid  
842 were analyzed as the control. (See also [Fig. S8B](#))

843 **(C)** Survival rates of the non-growing late stationary-phase wild-type (control), *nuoA*-  
844 knockdown or *sdhC*-knockdown cells that were re-cultured in fresh medium after being  
845 treated with ofloxacin (5  $\mu\text{g/ml}$ ) or ampicillin (200  $\mu\text{g/ml}$ ). The survival rates were  
846 calculated according to the equation: [CFU of the antibiotic-treated cells] / [CFU of the  
847 untreated cells]  $\times 100$ .

848 The symbol \* in **(B)** and **(C)** denotes a significant difference between the compared  
849 pair of samples ( $P$ -value  $< 0.05$ ,  $t$ -test). At least three biological replicates were  
850 analyzed for obtaining each value.

851



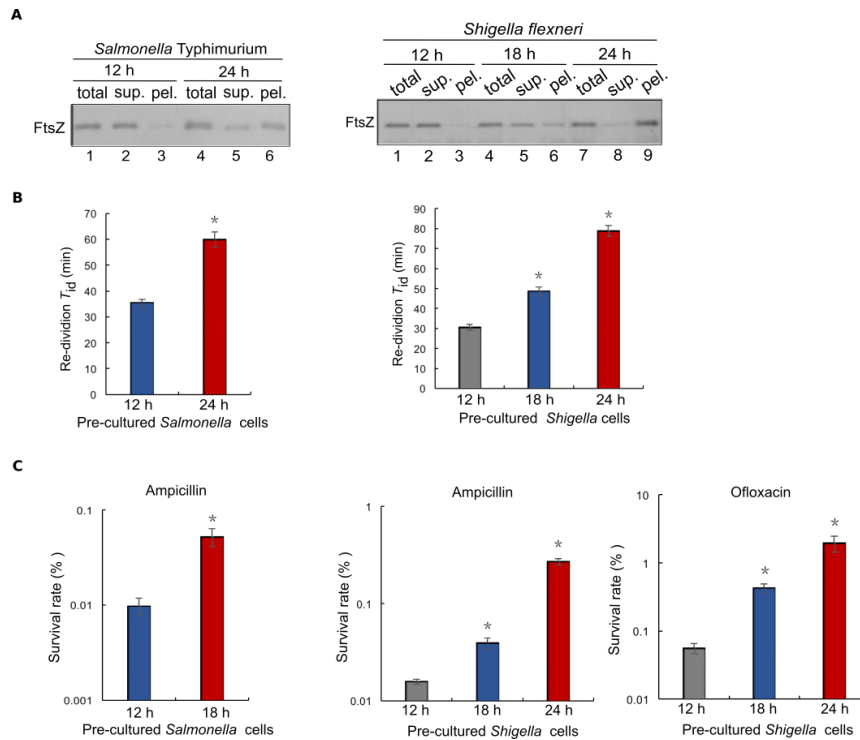

852

853 **Figure 6. Regrowth-delay bodies are also formed in the non-growing late**  
 854 **stationary-phase cells of the pathogenic bacteria *Salmonella Typhimurium***  
 855 ***SL1344* and *Shigella flexneri* serotype 2a 2457T.**

856 (A) Immunoblotting results for the detection of FtsZ in the indicated cell lysate  
 857 fractions of the non-growing stationary-phase *Salmonella Typhimurium* or *Shigella*  
 858 *flexneri* cells taken at the indicated time points, probed with antibodies against the *E.*  
 859 *coli* FtsZ protein.

860 (B) Re-division  $T_{id}$  values of the non-growing *Salmonella Typhimurium* or *Shigella*  
 861 *flexneri* cells that were pre-cultured to the indicated time points of the stationary-phase  
 862 before being re-cultured in fresh LB medium. (See also [Fig. S9](#))

863 (C) Survival rates of the non-growing *Salmonella Typhimurium* or *Shigella flexneri*  
 864 cells that were pre-cultured to the indicated time points of the stationary-phase before

865 being re-cultured in fresh LB medium after being treated with the indicated antibiotics

866 for 2 h.

867 The symbol \* in (B) and (C) denotes a significant difference between the compared

868 pair of samples ( $P$ -value  $< 0.05$ ,  $t$ -test). At least three biological replicates were

869 analyzed for obtaining each value.

870

871

## 872 Supplemental figures

873

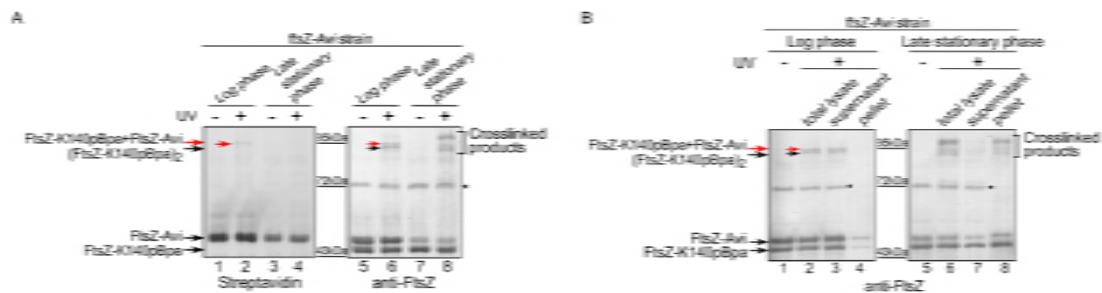

874

875 **Figure S1. The cell division protein FtsZ exists as a self-assembled oligomer in**  
876 **actively dividing log-phase cells but as unassembled and insoluble form in non-**  
877 **growing late stationary-phase *E. coli* cells.**

878 (A) Blotting results for the detection of photo-crosslinked products of the FtsZ-

879 K140pBpa variant in the actively dividing log-phase and the non-growing late

880 stationary-phase *ftsZ-Avi* cells exposed to UV light, as probed with streptavidin-

881 alkaline phosphate conjugate (left part) or antibodies against FtsZ (right part). The

882 asterisk indicates a non-specific protein band detected when probed with the anti-FtsZ

883 antibodies.

884 **(B)** Immunoblotting results for the detection of photo-crosslinked products of the FtsZ-  
885 K140pBpa variant, as well as the free FtsZ monomers, in the supernatant (sup.) and  
886 pellet (pel.) fractions of the actively dividing log-phase or non-growing late stationary-  
887 phase *ftsZ-Avi* cells, as probed with antibodies against FtsZ.

888 Positions of the FtsZ monomers and photo-crosslinked dimers are shown on the left of  
889 the gels, positions of the molecular weight markers are shown in the middle of the gels  
890 (in both **A** and **B**).

891 Here, to verify the reported *in vitro* assembly pattern of FtsZ protofilaments in *E. coli*  
892 cells, we performed *in vivo* protein photo-crosslinking analysis by replacing the amino  
893 acid residue K140, located at the longitudinal interface of the FtsZ protofilament, with  
894 the unnatural amino acid pBpa. This FtsZ-K140pBpa variant, which we demonstrated  
895 to be able to support cell division in the absence of wild type FtsZ, was then  
896 heterologously expressed in a strain whose own genomic *ftsZ* gene was modified to  
897 encode an Avi-tagged FtsZ variant (the Avi tag could be specifically probed with  
898 streptavidin). As shown by the blotting results displayed here in **Fig. S1A**, the FtsZ  
899 dimers were formed either between the FtsZ-K140pBpa and FtsZ-Avi monomers (thus  
900 detectable not only by streptavidin AP conjugate but also by antibodies against FtsZ;  
901 red arrows) or between two FtsZ-K140pBpa monomers (only detectable by antibodies  
902 against FtsZ; black arrows) in actively dividing log-phase cells (lanes 2 and 6). These  
903 observations confirmed the location of residue K140 at a self-assembling interface and  
904 that FtsZ assembles into homo-oligomers in actively dividing cells. By contrast, in non-

905 growing late stationary-phase cells, the photo-crosslinked FtsZ dimers became no  
906 longer detectable (**Fig. S1A**, lanes 4 and 8), instead, multiple photo-crosslinked  
907 products between FtsZ-K140pBpa and other proteins were readily detected (lane 8).  
908 These results seem to indicate that residue K140 now mediate interactions with multiple  
909 other proteins in the non-growing bacterial cells.

910

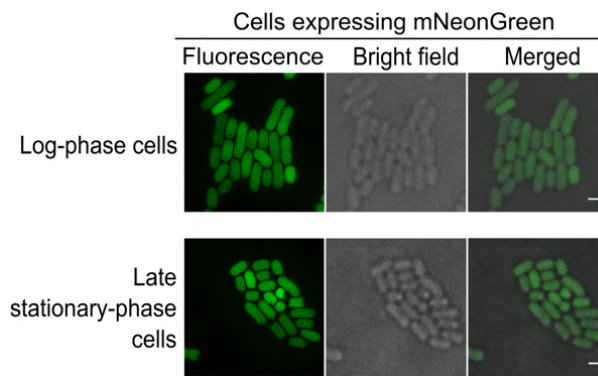

911

912 **Figure S2. Fluorescence and bright-field microscopic images of the actively**  
913 **dividing log-phase (top) and the non-growing late stationary-phase (bottom) *E.***  
914 ***coli* cells in which the green fluorescent protein mNeonGreen (without being fused**  
915 **to FtsZ) was heterologously expressed. Scale bars, 1  $\mu$ m.**

916

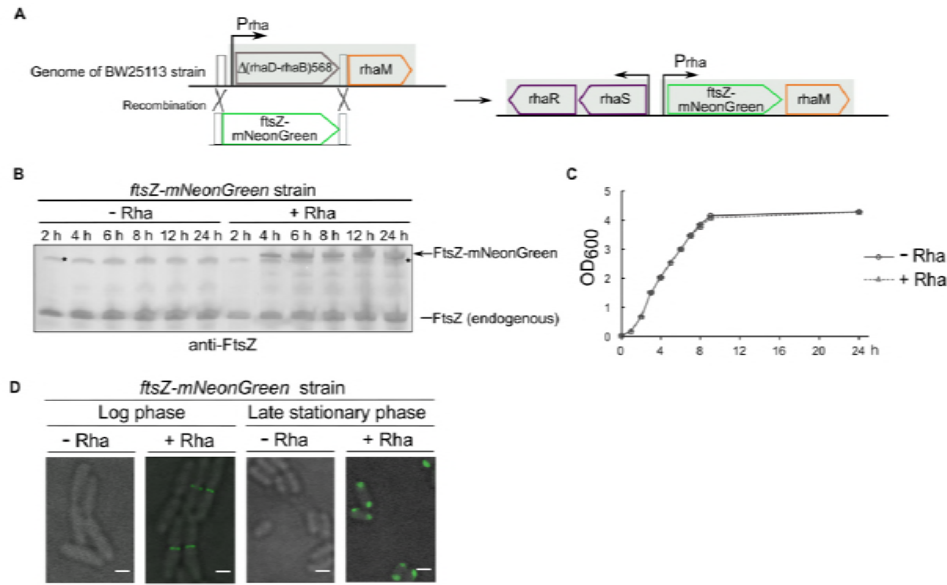

917

918 **Figure S3. Construction and verification of the *ftsZ-mNeonGreen* strain.**

919 (A) The *ftsZ-mNeonGreen* strain was constructed by replacing part of the rhamnose  
 920 operon by the *ftsZ-mNeonGreen* gene (green outline) in the *E. coli* genome. The  
 921 transcription initiation sites and directions of transcriptions are both indicated by the  
 922 arrows (top panel). Immunoblotting results for detecting the FtsZ-mNeonGreen protein  
 923 expressed in the *ftsZ-mNeonGreen* strain as cultured in the presence (+Rha) or absence  
 924 (-Rha) of rhamnose (0.02%) to the indicated time points, as probed with antibodies  
 925 against FtsZ; positions of the two forms of FtsZ are indicated on the right. Asterisk  
 926 indicates a non-specific protein band (bottom left panel).

927 (B) Growth curves of the *ftsZ-mNeonGreen* strain cultured in the presence (+Rha) or  
 928 absence (-Rha) of rhamnose (0.02%), as prepared by measuring the OD<sub>600</sub> values at the  
 929 indicated time points (bottom right panel).

930 (C) Immunoblotting results for detecting the FtsZ-mNeonGreen protein expressed in  
 931 the *ftsZ-mNeonGreen* strain cultured in the presence (+Rha) or absence (-Rha) of

932 rhamnose (0.02%) and to the indicated time points, as probed with antibodies against  
933 FtsZ. Positions of the two forms of FtsZ are indicated on the right. Asterisk indicates a  
934 nonspecific band.

935 **(D)** Bright field and fluorescence microscopic images of the log-phase or late  
936 stationary-phase *ftsZ-mNeonGreen* cells cultured in LB media with (+Rha) or without  
937 (-Rha) the addition of rhamnose. Scale bars, 1  $\mu$ m.

938

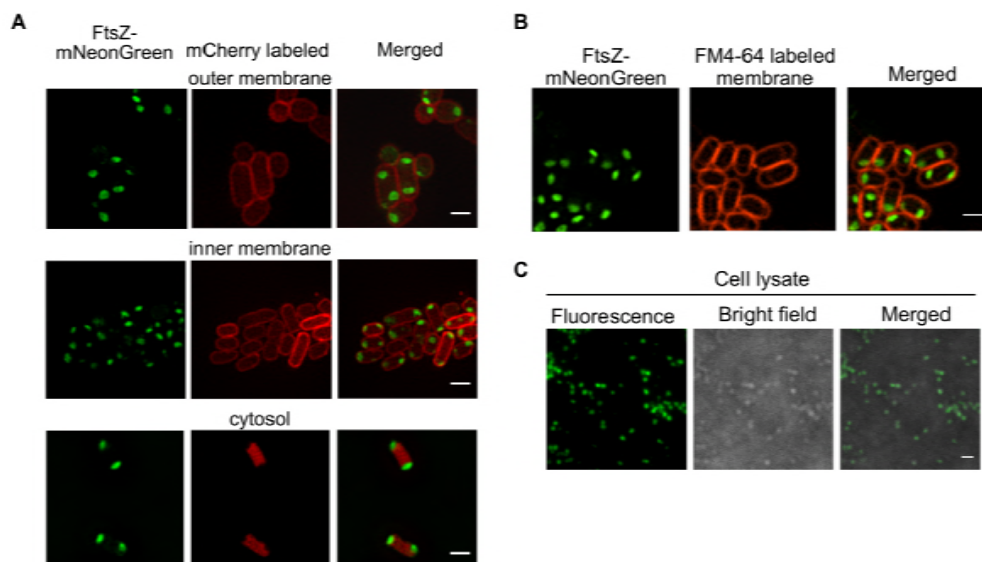

939

940 **Figure S4. The regrowth-delay bodies exist as a compact subcellular structure in**  
941 **the cytosol and seem to be associated with the inner membrane but not surrounded**  
942 **by any membrane component.**

943 **(A)** Fluorescence microscopic images of the non-growing late stationary-phase *ftsZ-*  
944 *mNeonGreen* cells whose outer membrane (top), inner membrane (middle) or cytosol  
945 (bottom) was separately labeled with OmpA-fused mCherry, NlpA anchoring peptide-  
946 fused mCherry or unfused mCherry, respectively. Scale bars, 1  $\mu$ m.

947 **(B)** Fluorescence microscopic images of the non-growing late stationary-phase *ftsZ*-  
 948 *mNeonGreen* cells stained with the membrane specific FM4-64 dye. Scale bars, 1  $\mu$ m.

949 **(C)** Fluorescence and bright field microscopic images of the regrowth-delay bodies  
 950 detected in the lysates of non-growing late stationary-phase (cultured to 24 h) *ftsZ*-  
 951 *mNeonGreen* cells. Scale bars, 1  $\mu$ m.

952

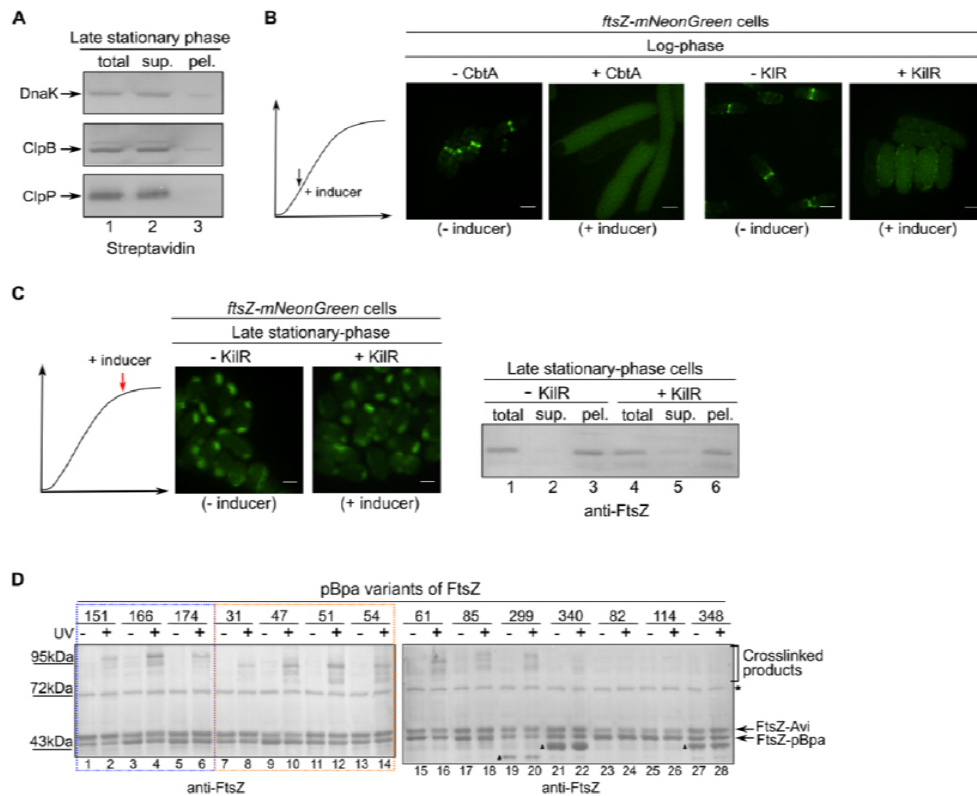

953

954 **Figure S5. Expression of the inhibitor protein CbtA or KilR prevents FtsZ to**

955 **assemble into the Z-ring structure in log-phase *ftsZ-mNeonGreen* cells. However,**

956 **expression of KilR (in contrast to CbtA, as shown in Fig. 1D) does not prevent**

957 **FtsZ to enter the regrowth-delay bodies.**

958 (A) Blotting results for the detection of DnaK-Avi, ClpB-Avi or ClpP-Avi protein in  
959 the indicated fractions of non-growing late stationary-phase *E. coli* cells, probed with  
960 the streptavidin-AP conjugate (against the Avi tag).

961 (B) Fluorescence microscopic images of log-phase *ftsZ-mNeonGreen* cells in which the  
962 expression of the CbtA or KilR inhibitor protein was induced. Scale bars, 1  $\mu$ m.

963 (C) Fluorescence microscopic images of the non-growing late stationary-phase *ftsZ-*  
964 *mNeonGreen* cells in which the expression of KilR was induced (left panel) and the  
965 corresponding immunoblotting results for the detection of the indicated cell lysate  
966 fractions, probed with antibodies against FtsZ (right panel). Scale bars, 1  $\mu$ m.

967

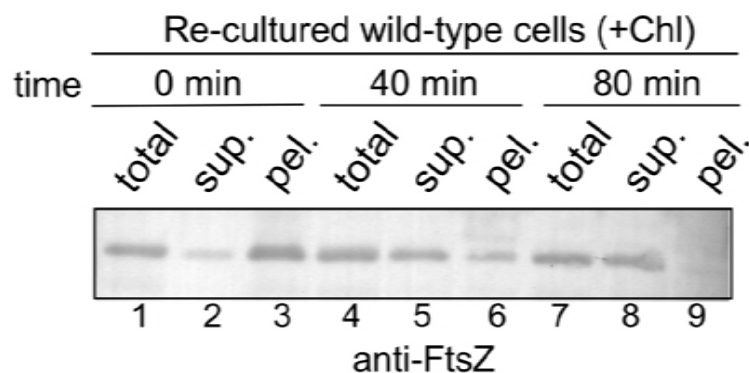

968

969 **Figure S6. The FtsZ protein disappears from the pellet fraction and reappears in**  
970 **the supernatant fraction in a time-dependent manner when the non-growing late**  
971 **stationary-phase cells are re-cultured in the presence of chloramphenicol.**

972 Immunoblotting results for the detection of FtsZ protein in the indicated cell lysate  
973 fractions when non-growing late stationary-phase wild-type cells were re-cultured in



974 fresh LB medium containing chloramphenicol to the indicated time points, probed with

975 anti-FtsZ antibodies.

976

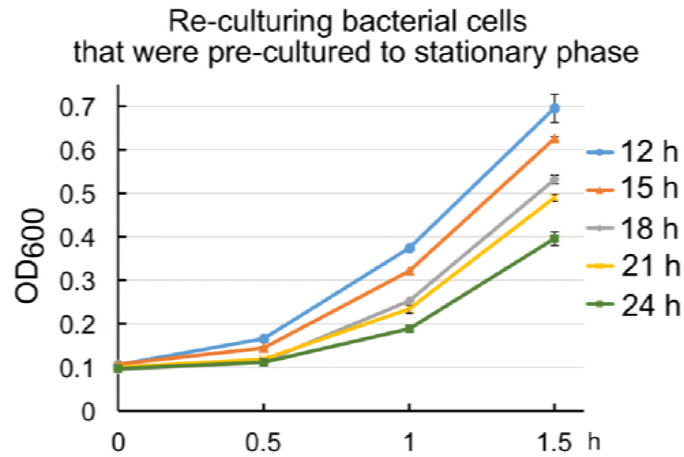

977

978 **Figure S7. Growth curves of the re-cultured wild-type *E. coli* cells that were pre-**  
979 **cultured to the indicated time points in the stationary phase.**

980 These growth curves were used to calculate the average initial doubling time upon re-

981 division (re-division  $T_{id}$ ), which reflects the regrowth lag time for each set of the non-

982 growing stationary phase cells. At least three biological replicates were analyzed for

983 obtaining each value.

984

985

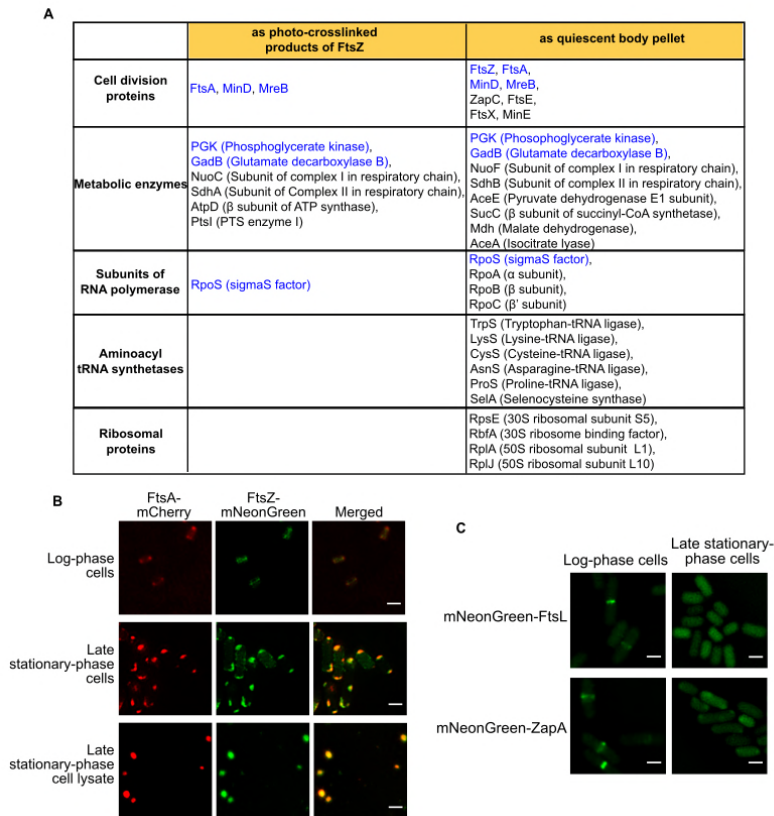

986

987 **Figure S8. Multiple key cellular proteins are identified in regrowth-delay bodies**  
 988 **by mass spectrometry analyses and live-cell imaging analysis verified the presence**  
 989 **of FtsA and the absence of FtsL or ZapA in regrowth-delay bodies.**

990 **(A)** List of major proteins identified by mass spectrometry analyses, both as the photo-  
 991 crosslinked products of five pBpa variants of FtsZ (as shown in **Figs. S1A** and **S4D**)  
 992 and as present in the pellets containing the regrowth-delay bodies, isolated from the  
 993 non-growing *ftsZ-Avi* and wild-type late stationary-phase cells, respectively.

994 **(B)** Fluorescence microscopic images of the actively dividing log-phase (top) or the  
 995 non-growing late stationary-phase (middle) *ftsZ-mNeonGreen* cells in which FtsA-  
 996 mCherry was expressed from a plasmid controlled by a constitutive promoter, as well

997 as of the lysate of the same non-growing late stationary-phase cells (bottom). Scale bars,  
998 1  $\mu\text{m}$ .

999 (C) Fluorescence microscopic images of the actively dividing log-phase or non-  
1000 growing late stationary-phase cells in which mNeonGreen-FtsL or mNeonGreen-ZapA  
1001 was heterogeneously expressed from a plasmid. Scale bars, 1  $\mu\text{m}$ .

1002

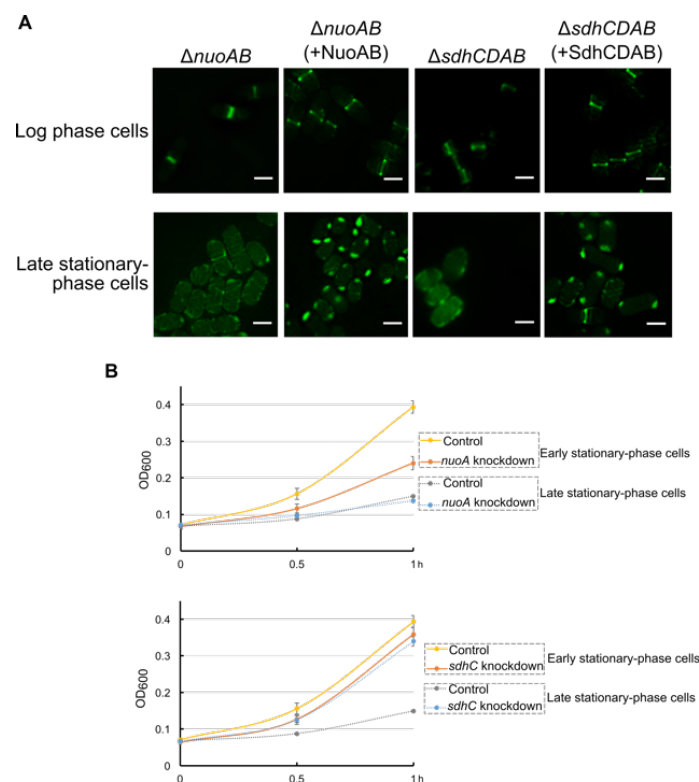

1003

1004 **Figure S9. The formation of regrowth-delay bodies in *nuoAB* knockout ( $\Delta nuoAB$ )**  
1005 **or *sdhCDAB* knockout ( $\Delta sdhCDAB$ ) non-growing late stationary-phase cells is**  
1006 **significantly reduced, and the regrowth lag time of non-growing late stationary-**  
1007 **phase *nuoA* or *sdhC* knockdown cells is significantly shortened.**

1008 (A) Fluorescence microscopic images of log-phase (top) and late stationary-phase  
1009 (bottom) *ftsZ-mNeonGreen* cells in which the *nuoAB* or *sdhCDAB* genes were deleted.

1010 Scale bars, 1  $\mu\text{m}$ .

1011 (B) Growth curves of the re-cultured early or late stationary-phase *nuoA* or *sdhC*  
1012 knockdown cells. Here, cells in which a non-targeting crRNA was expressed from a  
1013 plasmid were analyzed as the control. All experiments were independently repeated  
1014 three times.

1015

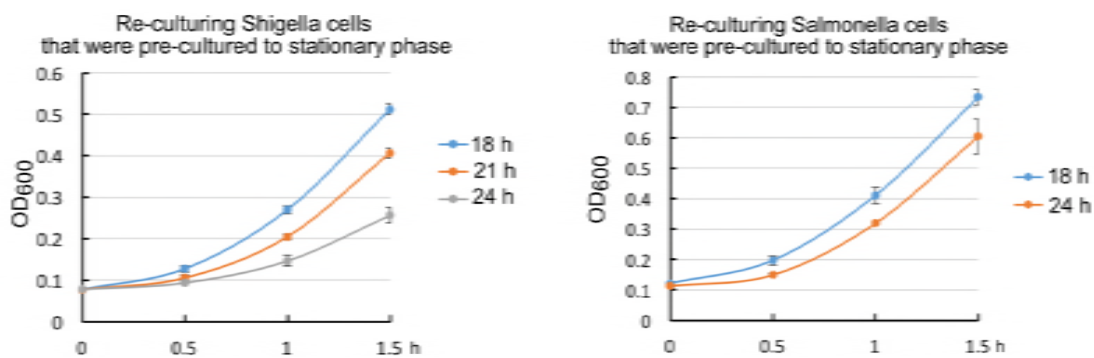

1016

1017 **Figure S10. Growth curves of the re-cultured *Shigella* and *Salmonella* bacterial**  
1018 **cells that were pre-cultured to the indicated time points in stationary-phase.**

1019

## 1020 **STAR Methods**

1021 **Bacterial strains, plasmids, and genome modifications.** Listed in **Table S1** are the  
1022 genotypes of the used *E. coli* strains, all derived from the BW25113 strain with  
1023 genotype : F<sup>-</sup>, DE(araD-araB)567, lacZ4787(del)::rrnB-3, LAM<sup>-</sup>, rph-1, DE(rhaD-  
1024 rhaB)568, hsdR514 (Blattner et al., 1997). The analyzed pathogenic strains were  
1025 *Salmonella* Typhimurium SL1344 and *Shigella flexneri* serotype 2a 2457T. All the  
1026 plasmids employed in this study are listed in **Table S2**. Genome modifications were  
1027 performed using the  $\lambda$ -red genomic recombination system (Lee et al., 2009). Newly  
1028 generated plasmids and genome modifications were all confirmed by DNA sequencing.

1029 **Bacterial cell culturing.** LB liquid (10 g/l tryptone, 5 g/l yeast extract, and 5 g/l NaCl)  
1030 and agar-containing solid culture medium were sterilized by autoclaving. *Salmonella*  
1031 Typhimurium SL1344 and *Shigella flexneri* serotype 2a 2457T were cultured in LB  
1032 medium with 30  $\mu\text{g/ml}$  streptomycin. For plasmid selection, 50  $\mu\text{g/ml}$  kanamycin, 34  
1033  $\mu\text{g/ml}$  chloramphenicol, or 100  $\mu\text{g/ml}$  ampicillin was added to the culture medium.  
1034 Log-phase and late stationary-phase cells refer to cells that were cultured at 37°C in  
1035 test tubes and shook at 260 r.p.m. for 6 h and 24 h, respectively, after the overnight-  
1036 cultured cells were diluted 100-fold in fresh LB medium. The expression of CbtA or  
1037 KilR was induced by addition of 0.2  $\mu\text{g/ml}$  anhydrotetracycline. For membrane staining,  
1038 FM4-64 (2  $\mu\text{g/ml}$ ) was added to the culture medium, and the cells were then further  
1039 cultured for another 1 h.

1040 **In vivo protein photo-crosslinking of pBpa variants of FtsZ.** To perform the  
1041 photo-crosslinking analysis within the LY928-*ftsZ-Avi* strain (in which endogenous  
1042 wild-type FtsZ protein was expressed with an Avi tag fused to its C-terminus) that we  
1043 constructed, each pBpa variant was expressed from a plasmid at a level comparable  
1044 with that of endogenous FtsZ, and the cells were cultured to log or late stationary phase  
1045 at 37°C in LB medium containing 200  $\mu\text{M}$  pBpa. The cells were irradiated with UV  
1046 light (365 nm) for 10 min at room temperature using a Hoefer UVC 500 Crosslinker  
1047 (Amersham Biosciences, USA) and then collected by centrifugation at 13,000  $\times g$   
1048 before being subjected to further (blotting) analysis.

1049 **Fluorescence microscopic imaging.** Cell or cell lysate samples were placed on a glass  
1050 dish (NEST Biotechnology, USA) and covered with agar before micrographs were  
1051 acquired at 37°C (for the re-culturing cell samples) or 30°C (for all other samples) with  
1052 an N-SIM imaging system (Nikon, Japan) using the 2D-SIM mode, a 100 $\times$ /1.49 NA  
1053 oil-immersion objective (Nikon, Japan), and under excitation of a 488 nm or 561 nm  
1054 laser beam. The 3D images were acquired with an N-SIM imaging system using the 3D  
1055 mode. The samples were sectioned every 120 nm along the Z-axis. The images were  
1056 further reconstructed using the NIS-Elements AR 4.20.00 (Nikon, Japan) before a  
1057 further processing with the GNU image manipulation program. At least four images  
1058 were obtained, and more than 50 bacterial cells were examined for each experiment.  
1059 All experiments were independently repeated at least three times.

1060 **Cell lysate fractionations.** The non-growing late stationary-phase bacterial cells were  
1061 prepared by growing the cells at 37°C (with shaking at 260 r.p.m.) for 24 h after the  
1062 overnight-cultured cells were diluted 100-fold into fresh LB medium. The cell samples  
1063 (such as those used in [Fig. S5](#)) of the re-culturing experiments were prepared by  
1064 transferring the 2-fold diluted non-growing late stationary-phase cells into fresh LB  
1065 medium in the presence of chloramphenicol (34  $\mu\text{g/ml}$ ) and further culturing them at  
1066 37°C (with shaking at 260 r.p.m.) to the indicated time points. The cells were then  
1067 collected by centrifugation (8000  $\times g$ ) and disrupted using a French press at 1000 MPa  
1068 before centrifugation at 13,000  $\times g$  to separate the supernatant and pellet fractions.

1069 **Protein purification and mass spectrometry analysis.** The photo-crosslinked  
1070 products of pBpa variants of FtsZ-Avi generated in the LY 928 strain were individually  
1071 purified using streptavidin magnetic beads after the pellet containing the photo-  
1072 crosslinked products was dissolved in 8 M urea and diluted 10-fold in binding buffer.  
1073 The eluted protein samples were then further resolved by SDS-PAGE.

1074 For identification of proteins in the regrowth-delay bodies, the pellet from non-growing  
1075 late stationary-phase wild type cell lysates was collected, dissolved in 8 M urea, and  
1076 centrifuged again at  $13,000 \times g$  before removing the new pellet. The supernatant was  
1077 then concentrated 10-fold and resolved by SDS-PAGE.

1078 In both of the above cases, the protein bands of SDS-PAGE that could be clearly  
1079 visualized by Coomassie blue staining on the gel, and were excised and sent for mass  
1080 spectrometry analysis.

1081 **Blotting analysis.** Each sample, including the cell lysate, supernatant fraction, pellet  
1082 fraction, or UV-irradiated cells, was supplemented with the sample buffer, boiled, and  
1083 resolved via tricine SDS-PAGE before being further probed with particular antibodies  
1084 or streptavidin-AP conjugate (for the Avi-tagged proteins) for the blotting analysis. The  
1085 protein bands visualized on the gels were scanned and processed using the GNU image  
1086 manipulation program.

1087 **CRISPRi experiments.** CRISPRi was performed according to previously reported  
1088 methods (Luo et al., 2015). Briefly, plasmids carrying a crRNA that targets the *nuoA*  
1089 or *sdhC* gene were transformed into *E. coli* cells in which the proteins for recognizing  
1090 and binding specific DNA sequences were expressed from the Cascade operon while  
1091 the gene (*cas3* gene) encoding the protein that cleaves the target sequence was deleted.  
1092 The DNA sequences designed for knocking down the *nuoA* and the *sdhC* genes were:  
1093 ATAGCGAATGCCAGTGATGAGCGATGACTTC and  
1094 AATGTGAAAAACAAAGACCTGTTAATCTGGA, respectively. The control  
1095 plasmid carried a non-targeting crRNA sequence: CTGCTGGAGCTGGCTG  
1096 CAAGGCAAGCCGCCA. The crRNAs on the plasmids were transcribed  
1097 constitutively rather than induced.

1098 **Cell regrowth and calculation of the average re-division  $T_{id}$ .** Log-phase or late  
1099 stationary-phase cells of a particular type were diluted 40-fold into fresh LB medium  
1100 and cultured at 37°C with shaking (260 r.p.m.). Growth curves were prepared by  
1101 measuring the OD<sub>600</sub> value of the cultured cells at 30-min intervals. The re-division  $T_{id}$   
1102 value was calculated as  $30 / \log_2^{N_{t1}/N_{t0}}$  min, where  $N_{t0}$  and  $N_{t1}$  were the numbers of  
1103 cells at 0 min and 30 min, respectively. The  $N_{t1}/N_{t0}$  ratio for each batch of cultured cells  
1104 was calculated based on the increase in optical density at 600 nm (the correlation  
1105 between the cell number and the OD<sub>600</sub> value was determined by preparing a standard  
1106 curve). At least three biological replicates were analyzed for obtaining each value.

1107 **Assay for cell survival after antibiotic treatment.** Stationary-phase cells were diluted  
 1108 40-fold into fresh LB medium containing either 5  $\mu\text{g/ml}$  ofloxacin or 200  $\mu\text{g/ml}$   
 1109 ampicillin and incubated at 37°C with shaking (260 r.p.m.) for 2 h. The cells were then  
 1110 collected by centrifugation (to remove the culture medium and the antibiotics),  
 1111 resuspended in phosphate-buffered saline (PBS), and serially diluted in PBS buffer  
 1112 before being spotted on LB agar plates for CFU counting. The cell survival rate was  
 1113 calculated as follows: [number of colonies formed after antibiotic treatment] / [number  
 1114 of colonies formed without antibiotic treatment]  $\times$  100. At least three biological  
 1115 replicates were analyzed for obtaining each value.

1116

1117 **Table S1. *E. coli* strains used in this study**

| Strain                                                | Genotype <sup>a</sup>                                                                                                       | Source/Reference                  |
|-------------------------------------------------------|-----------------------------------------------------------------------------------------------------------------------------|-----------------------------------|
| BW25113                                               | $\Delta(\text{araD-araB})567 \Delta\text{lacZ4787}(\text{:rrnB-3}) \text{rph-1} \Delta(\text{rhaD-rhaB})568 \text{hsdR514}$ | (Baba et al., 2006)               |
| LY928                                                 | BW25113 $\Delta\text{insH11}::\text{aminoacyl-tRNA synthetase of pBpa-tRNA}^{\text{pBpa}}$                                  | Laboratory storage                |
| <i>ftsZ-Avi</i>                                       | LY928 <i>ftsZ::ftsZ-Avi tag</i>                                                                                             | Laboratory storage                |
| <i>ftsZ-mNeonGreen</i>                                | LY928 $\Delta(\text{rhaD-rhaB})568::\text{ftsZ-mNeonGreen}$                                                                 | Recombineering                    |
| <i>ftsZ-mNeonGreen-dnaK-mCherry</i>                   | <i>ftsZ-mNeonGreen dnaK::dnaK-mCherry</i>                                                                                   | Recombineering                    |
| <i>ftsZ-mNeonGreen-clpB-mCherry</i>                   | <i>ftsZ-mNeonGreen clpB::clpB-mCherry</i>                                                                                   | Recombineering                    |
| $\Delta\text{cas3}$                                   | LY928 $\Delta\text{cas3 P}_{\text{casA}}::\text{P}_{\text{con}}$                                                            | Recombineering (Luo et al., 2015) |
| <i>ftsZ-mNeonGreen-<math>\Delta\text{cas3}</math></i> | $\Delta\text{cas3} \Delta(\text{rhaD-rhaB})568::\text{ftsZ-mNeonGreen}$                                                     | Recombineering                    |
| $\Delta\text{nuoAB}$                                  | <i>ftsZ-mNeonGreen <math>\Delta\text{nuoAB}::\text{Kan}^{\text{R}}</math></i>                                               | Recombineering                    |
| $\Delta\text{sdhCDAB}$                                | <i>ftsZ-mNeonGreen <math>\Delta\text{sdhCDAB}::\text{Kan}^{\text{R}}</math></i>                                             | Recombineering                    |
| Salmonella                                            | <i>Salmonella</i> Typhimurium SL1344                                                                                        | ATCC                              |

| Strain   | Genotype <sup>a</sup>                      | Source/Reference |
|----------|--------------------------------------------|------------------|
| Shigella | <i>Shigella flexneri</i> serotype 2a 2457T | ATCC             |

1118 <sup>a</sup> P<sub>con</sub> is a synthetic constitutive promoter (Luo et al., 2015).

1119

1120

1121

1122 **Table S2. Plasmids used in this study**

| Plasmid                   | Genotype <sup>a</sup>                                                                                                                                                              | ori    | Reference/Source                      |
|---------------------------|------------------------------------------------------------------------------------------------------------------------------------------------------------------------------------|--------|---------------------------------------|
| pTet-FtsZ-pBpa-mNeonGreen | <i>bla</i> P <sub>tet1</sub> :: <i>ftsZ-pBpa-mNeonGreen</i>                                                                                                                        | pBR322 | This study                            |
| pTet-mNeonGreen           | <i>bla</i> P <sub>tet1</sub> :: <i>mNeonGreen</i>                                                                                                                                  | pBR322 | This study                            |
| pTac-mCherry              | <i>bla</i> P <sub>con</sub> :: <i>mCherry</i>                                                                                                                                      | pBR322 | This study                            |
| pBAD-SSnlpA-mCherry       | <i>bla</i> P <sub>ara</sub> :: <i>signal peptide of nlpA-mCherry</i>                                                                                                               | pBR322 | This study                            |
| pBAD-OmpA-mCherry         | <i>bla</i> P <sub>ara</sub> :: <i>ompA-mCherry</i>                                                                                                                                 | pBR322 | This study                            |
| pACE                      | <i>cl</i> P <sub>ara</sub> :: $\lambda$ -Red recombinase P <sub>ara</sub> ::I-SceI endonuclease                                                                                    | p15A   | Laboratory storage (Lee et al., 2009) |
| pYLC-rha-FtsZ-mNeonGreen  | <i>bla</i> upstream homologous sequence- <i>ftsZ-mNeonGreen-Kan<sup>R</sup></i> - downstream homologous sequence, for inserting <i>ftsZ-mNeonGreen</i> into the genomic rha operon | pBR322 | This study                            |
| pYLC-dnaK-mcherry         | <i>bla</i> upstream homologous sequence- <i>mCherry-Kan<sup>R</sup></i> - downstream homologous sequence, for inserting <i>mCherry</i> into the C-terminus of genomic <i>dnaK</i>  | pBR322 | This study                            |
| pYLC-clpB-mcherry         | <i>bla</i> upstream homologous sequence- <i>mCherry-Kan<sup>R</sup></i> - downstream homologous sequence, for inserting <i>mCherry</i> into the C-terminus of genomic <i>clpB</i>  | pBR322 | This study                            |



---

|                   |                                                                   |        |                    |
|-------------------|-------------------------------------------------------------------|--------|--------------------|
| pTetO-CbtA        | <i>bla</i> P <sub>tet-T</sub> :: <i>cbtA-coupling-mCherry-his</i> | pBR322 | This study         |
| pTet-FtsZ-140pBpa | <i>bla</i> P <sub>tet1</sub> :: <i>ftsZ-140pBpa</i>               | pBR322 | Laboratory storage |
| pTet-FtsZ-31pBpa  | <i>bla</i> P <sub>tet1</sub> :: <i>ftsZ-31pBpa</i>                | pBR322 | Laboratory storage |
| pTet-FtsZ-47pBpa  | <i>bla</i> P <sub>tet1</sub> :: <i>ftsZ-47pBpa</i>                | pBR322 | Laboratory storage |
| pTet-FtsZ-51pBpa  | <i>bla</i> P <sub>tet1</sub> :: <i>ftsZ-51pBpa</i>                | pBR322 | Laboratory storage |
| pTet-FtsZ-54pBpa  | <i>bla</i> P <sub>tet1</sub> :: <i>ftsZ-54pBpa</i>                | pBR322 | Laboratory storage |
| pTet-FtsZ-61pBpa  | <i>bla</i> P <sub>tet1</sub> :: <i>ftsZ-61pBpa</i>                | pBR322 | Laboratory storage |
| pTet-FtsZ-82pBpa  | <i>bla</i> P <sub>tet1</sub> :: <i>ftsZ-82pBpa</i>                | pBR322 | Laboratory storage |
| pTet-FtsZ-85pBpa  | <i>bla</i> P <sub>tet1</sub> :: <i>ftsZ-85pBpa</i>                | pBR322 | Laboratory storage |
| pTet-FtsZ-114pBpa | <i>bla</i> P <sub>tet1</sub> :: <i>ftsZ-114pBpa</i>               | pBR322 | Laboratory storage |
| pTet-FtsZ-151pBpa | <i>bla</i> P <sub>tet1</sub> :: <i>ftsZ-151pBpa</i>               | pBR322 | Laboratory storage |
| pTet-FtsZ-166pBpa | <i>bla</i> P <sub>tet1</sub> :: <i>ftsZ-166pBpa</i>               | pBR322 | Laboratory storage |
| pTet-FtsZ-174pBpa | <i>bla</i> P <sub>tet1</sub> :: <i>ftsZ-174pBpa</i>               | pBR322 | Laboratory storage |
| pTet-FtsZ-288pBpa | <i>bla</i> P <sub>tet1</sub> :: <i>ftsZ-288pBpa</i>               | pBR322 | Laboratory storage |
| pTet-FtsZ-340pBpa | <i>bla</i> P <sub>tet1</sub> :: <i>ftsZ-340pBpa</i>               | pBR322 | Laboratory storage |
| pTet-FtsZ-348pBpa | <i>bla</i> P <sub>tet1</sub> :: <i>ftsZ-348pBpa</i>               | pBR322 | Laboratory storage |
| pTac-trpS-Avi     | <i>bla</i> P <sub>con</sub> :: <i>trpS-Avitag</i>                 | pBR322 | This study         |
| pTac-rpoS-Avi     | <i>bla</i> P <sub>con</sub> :: <i>rpoS-Avitag</i>                 | pBR322 | This study         |
| pTac-aceE-Avi     | <i>bla</i> P <sub>con</sub> :: <i>aceE-Avitag</i>                 | pBR322 | This study         |
| pTac-rplL-Avi     | <i>bla</i> P <sub>con</sub> :: <i>rplL-Avitag</i>                 | pBR322 | This study         |

|                             |                                                                                                                                                                                                                                                             |        |            |
|-----------------------------|-------------------------------------------------------------------------------------------------------------------------------------------------------------------------------------------------------------------------------------------------------------|--------|------------|
| pTac-FtsA-mNeonGreen        | <i>bla</i> P <sub>con</sub> :: <i>ftsA-mNeonGreen</i><br>(Durand-Heredia et al., 2011)                                                                                                                                                                      | pBR322 | This study |
| pTac-FtsA-mCherry           | <i>bla</i> P <sub>con</sub> :: <i>ftsA-mCherry</i><br>(Ma et al., 1996)                                                                                                                                                                                     | pBR322 | This study |
| pTac-mNeonGreen-ZapA        | <i>bla</i> P <sub>con</sub> :: <i>zapA-mNeonGreen</i>                                                                                                                                                                                                       | pBR322 | This study |
| pTac-ZapC-mNeonGreen        | <i>bla</i> P <sub>con</sub> :: <i>zapC-mNeonGreen</i>                                                                                                                                                                                                       | pBR322 | This study |
| pTac-mNeonGreen-FtsL        | <i>bla</i> P <sub>con</sub> :: <i>mNeonGreen-ftsL</i><br>(Ghigo and Beckwith, 2000)                                                                                                                                                                         | pBR322 | This study |
| pYLC-Δ <i>Cas3</i> -kana    | <i>bla</i> upstream homologous<br>sequence- <i>Kan<sup>R</sup></i> -P <sub>con</sub> -downstream<br>homologous sequence, for<br>deleting the <i>cas3</i> gene and<br>replacing the native promoter of<br>the Cascade operon with a<br>constitutive promoter | pBR322 | This study |
| pTac-nuoAi                  | <i>cat</i> P <sub>con</sub> ::crRNA sequence<br>targeting <i>nuoA</i>                                                                                                                                                                                       | pBR322 | This study |
| pTac-sdhCi                  | <i>cat</i> P <sub>con</sub> ::crRNA sequence<br>targeting <i>sdhC</i>                                                                                                                                                                                       | pBR322 | This study |
| pYLC-Δ <i>nuoAB</i> -kana   | <i>bla</i> upstream homologous<br>sequence- <i>Kan<sup>R</sup></i> - downstream<br>homologous sequence, for<br>deleting the <i>nuoAB</i> gene                                                                                                               | pBR322 | This study |
| pYLC-Δ <i>sdhCDAB</i> -kana | <i>bla</i> upstream homologous<br>sequence- <i>Kan<sup>R</sup></i> - downstream<br>homologous sequence, for<br>deleting the <i>sdhCDAB</i> gene                                                                                                             | pBR322 | This study |
| pTac-NuoAB                  | <i>bla</i> P <sub>con</sub> :: <i>nuoAB</i>                                                                                                                                                                                                                 | pBR322 | This study |
| pTac-sdhCDAB                | <i>bla</i> P <sub>con</sub> :: <i>sdhCDAB</i>                                                                                                                                                                                                               | pBR322 | This study |

1123 <sup>a</sup> P<sub>tet</sub>, P<sub>ara</sub> and P<sub>con</sub> indicate the Tet-on/Tet-off, arabinose and synthetic constitutive  
 1124 (selected from the Anderson promoter collection:  
 1125 parts.igem.org/Promoters/Catalog/Anderson) promoters, respectively. P<sub>tet1</sub> indicates  
 1126 that the expression of proteins was not induced by anhydrotetracycline, just via leaky  
 1127 expression. P<sub>tet-T</sub> indicates that the λt1 transcriptional terminator was inserted before  
 1128 the Tet promoter to achieve a stringent expression.
